# Supplementary material for: Effect of mutations on binding of ligands to guanine riboswitch probed by free energy perturbation and molecular dynamics simulations
Source: PubMed Central journal article supplement (PMC6649850; doi:10.1093/nar/gkz499), 2019-06-07
Supplement: gkz499_supplemental_file.pdf [file gkz499_supplemental_file.pdf]

# Effect of mutations on binding of ligands to guanine riboswitch probed by free energy perturbation and molecular dynamics simulations

Jianzhong Chen<sup>1,\*</sup>, Xingyu Wang<sup>2</sup>, Laixue Pang<sup>1</sup>, John Z.H. Zhang<sup>2,3</sup>, Tong Zhu<sup>2,3,\*</sup>

<sup>1</sup>School of Science, Shandong Jiaotong University, Jinan 250357 China, <sup>2</sup>NYU-ECNU Center for Computational Chemistry at NYU Shanghai, Shanghai, 200062, China, <sup>3</sup>Shanghai Engineering Research Center of Molecular Therapeutics & New Drug Development, School of Chemistry and Molecular Engineering, East China Normal University, Shanghai, 200062, China

## ORCID:

Jianzhong Chen: 0000-0003-1558-4398

John Z. H. Zhang: 0000-0003-4612-1863

Tong Zhu: 0000-0001-7472-3736

---

\* To whom correspondence should be addressed. E-mail: [chenjianzhong1970@163.com](mailto:chenjianzhong1970@163.com) and [jzchen@sdjtu.edu.cn](mailto:jzchen@sdjtu.edu.cn).  
Correspondence may also be addressed to Tong Zhu. Tel:      E-mail: [tzhu@lps.ecun.edu.cn](mailto:tzhu@lps.ecun.edu.cn).

**File S1. Force field parameters of HPA for Amber**

```
%VERSION  VERSION_STAMP = V0001.000  DATE = 06/08/18  09:24:49
%FLAG TITLE
%FORMAT(20a4)
lig
%FLAG POINTERS
%FORMAT(10I8)
    14      7      4      11      8      15      17      23      0      0
    64      1      11      15      23      11      19      9      9      0
    0      0      0      0      0      0      0      0      14      0
    0
%FLAG ATOM_NAME
%FORMAT(20a4)
N1 C2 N3 C4 C5 C6 O6 N7 C8 N9 H1 H2 H3 H4
%FLAG CHARGE
%FORMAT(5E16.8)
-8.84510442E+00  8.56083654E+00 -1.14563600E+01  1.00823986E+01 -5.98055886E+00
 1.33587681E+01 -1.15438270E+01 -5.04575487E+00  7.93398942E+00 -1.15347159E+01
 6.22291545E+00  1.07147124E+00  5.89855851E+00  1.27738323E+00
%FLAG ATOMIC_NUMBER
%FORMAT(10I8)
    7      6      7      6      6      6      8      7      6      7
    1      1      1      1
%FLAG MASS
%FORMAT(5E16.8)
 1.40100000E+01  1.20100000E+01  1.40100000E+01  1.20100000E+01  1.20100000E+01
 1.20100000E+01  1.60000000E+01  1.40100000E+01  1.20100000E+01  1.40100000E+01
 1.00800000E+00  1.00800000E+00  1.00800000E+00  1.00800000E+00
%FLAG ATOM_TYPE_INDEX
%FORMAT(10I8)
    1      2      3      2      2      2      4      5      2      3
    6      7      6      7
%FLAG NUMBER_EXCLUDED_ATOMS
%FORMAT(10I8)
    9      8      8      9      8      7      2      4      3      2
    1      1      1      1
%FLAG NONBONDED_PARM_INDEX
%FORMAT(10I8)
    1      2      4      7      11      16      22      2      3      5
```

|    |    |    |    |    |    |    |    |    |    |
|----|----|----|----|----|----|----|----|----|----|
| 8  | 12 | 17 | 23 | 4  | 5  | 6  | 9  | 13 | 18 |
| 24 | 7  | 8  | 9  | 10 | 14 | 19 | 25 | 11 | 12 |
| 13 | 14 | 15 | 20 | 26 | 16 | 17 | 18 | 19 | 20 |
| 21 | 27 | 22 | 23 | 24 | 25 | 26 | 27 | 28 |    |

%FLAG RESIDUE\_LABEL

%FORMAT(20a4)

HPA

%FLAG RESIDUE\_POINTER

%FORMAT(10i8)

1

%FLAG BOND\_FORCE\_CONSTANT

%FORMAT(5E16.8)

|                |                |                |                |                |
|----------------|----------------|----------------|----------------|----------------|
| 3.53830000E+02 | 3.56210000E+02 | 5.27310000E+02 | 4.50710000E+02 | 4.03490000E+02 |
| 3.69100000E+02 | 4.16130000E+02 | 3.54490000E+02 | 2.95350000E+02 | 6.52570000E+02 |
| 5.35140000E+02 |                |                |                |                |

%FLAG BOND\_EQUIL\_VALUE

%FORMAT(5E16.8)

|                |                |                |                |                |
|----------------|----------------|----------------|----------------|----------------|
| 1.38100000E+00 | 1.37900000E+00 | 1.01300000E+00 | 1.31700000E+00 | 1.08200000E+00 |
| 1.36900000E+00 | 1.37300000E+00 | 1.38000000E+00 | 1.46800000E+00 | 1.21800000E+00 |
| 1.01000000E+00 |                |                |                |                |

%FLAG ANGLE\_FORCE\_CONSTANT

%FORMAT(5E16.8)

|                |                |                |                |                |
|----------------|----------------|----------------|----------------|----------------|
| 1.10304000E+02 | 6.27370000E+01 | 8.71450000E+01 | 1.13811000E+02 | 6.65790000E+01 |
| 4.82850000E+01 | 7.38710000E+01 | 6.24610000E+01 | 9.10570000E+01 | 1.07603000E+02 |
| 9.26530000E+01 | 6.71870000E+01 | 7.04920000E+01 | 4.71010000E+01 | 8.67360000E+01 |
| 4.86910000E+01 | 6.86950000E+01 | 1.15504000E+02 | 6.12260000E+01 |                |

%FLAG ANGLE\_EQUIL\_VALUE

%FORMAT(5E16.8)

|                |                |                |                |                |
|----------------|----------------|----------------|----------------|----------------|
| 2.14675590E+00 | 2.01934681E+00 | 1.96698691E+00 | 2.14762857E+00 | 2.15146829E+00 |
| 2.08148056E+00 | 1.84114862E+00 | 2.19073822E+00 | 1.94866095E+00 | 2.19387981E+00 |
| 1.86732857E+00 | 2.11795796E+00 | 1.91811767E+00 | 2.19038915E+00 | 2.16298747E+00 |
| 2.05163542E+00 | 1.98679641E+00 | 1.95860933E+00 | 2.12144862E+00 |                |

%FLAG DIHEDRAL\_FORCE\_CONSTANT

%FORMAT(5E16.8)

|                |                |                |                |                |
|----------------|----------------|----------------|----------------|----------------|
| 4.75000000E+00 | 2.87500000E+00 | 2.50000000E+00 | 1.65000000E+00 | 4.00000000E+00 |
| 1.70000000E+00 | 2.00000000E+00 | 1.10000000E+00 | 1.05000000E+01 |                |

%FLAG DIHEDRAL\_PERIODICITY

%FORMAT(5E16.8)

|                |                |                |                |                |
|----------------|----------------|----------------|----------------|----------------|
| 2.00000000E+00 | 2.00000000E+00 | 2.00000000E+00 | 2.00000000E+00 | 2.00000000E+00 |
| 2.00000000E+00 | 1.00000000E+00 | 2.00000000E+00 | 2.00000000E+00 |                |

```

%FLAG DIHEDRAL_PHASE
%FORMAT(5E16.8)
  3.14159400E+00  3.14159400E+00  3.14159400E+00  3.14159400E+00  3.14159400E+00
  3.14159400E+00  0.00000000E+00  3.14159400E+00  3.14159400E+00
%FLAG SCCE_SCALE_FACTOR
%FORMAT(5E16.8)
  1.20000000E+00  1.20000000E+00  1.20000000E+00  1.20000000E+00  1.20000000E+00
  1.20000000E+00  1.20000000E+00  0.00000000E+00  0.00000000E+00
%FLAG SCNB_SCALE_FACTOR
%FORMAT(5E16.8)
  2.00000000E+00  2.00000000E+00  2.00000000E+00  2.00000000E+00  2.00000000E+00
  2.00000000E+00  2.00000000E+00  0.00000000E+00  0.00000000E+00
%FLAG SOLTY
%FORMAT(5E16.8)
  0.00000000E+00  0.00000000E+00  0.00000000E+00  0.00000000E+00  0.00000000E+00
  0.00000000E+00  0.00000000E+00  0.00000000E+00  0.00000000E+00
%FLAG LENNARD_JONES_ACOEF
%FORMAT(5E16.8)
  7.02078680E+05  7.01106848E+05  6.96551276E+05  7.76656876E+05  7.69642101E+05
  8.49322032E+05  5.15491878E+05  5.17507491E+05  5.74782316E+05  3.76435470E+05
  8.22085792E+05  8.20152428E+05  9.08092643E+05  6.04208667E+05  9.62429652E+05
  1.52360475E+03  1.71458823E+03  2.01475241E+03  9.87857350E+02  1.82491629E+03
  1.34728399E-01  5.06296765E+04  5.22195041E+04  5.87815925E+04  3.59538577E+04
  5.96470418E+04  5.02830284E+01  2.97255425E+03
%FLAG LENNARD_JONES_BCOEF
%FORMAT(5E16.8)
  6.77820248E+02  5.97113873E+02  5.24668528E+02  6.20851625E+02  5.44830041E+02
  5.65406768E+02  5.64804067E+02  4.98871431E+02  5.19385932E+02  4.69350655E+02
  7.75261695E+02  6.82622272E+02  7.09588248E+02  6.46321327E+02  8.86629877E+02
  1.57004457E+01  1.46824710E+01  1.57231024E+01  1.22938581E+01  1.81620725E+01
  7.34107347E-02  1.01949445E+02  9.12729468E+01  9.56653235E+01  8.35449674E+01
  1.16962018E+02  1.59752321E+00  1.38359132E+01
%FLAG BONDS_INC_HYDROGEN
%FORMAT(10I8)
  0      30      3      3      33      5      21      36      11      24
  39      5
%FLAG BONDS_WITHOUT_HYDROGEN
%FORMAT(10I8)
  0      3      1      0      15      2      3      6      4      6
  9      6      9      12      7      9      27      6      12      21

```

|                                  |    |     |     |    |    |    |     |     |    |
|----------------------------------|----|-----|-----|----|----|----|-----|-----|----|
| 8                                | 12 | 15  | 9   | 15 | 18 | 10 | 21  | 24  | 8  |
| 24                               | 27 | 4   |     |    |    |    |     |     |    |
| %FLAG ANGLES_INC_HYDROGEN        |    |     |     |    |    |    |     |     |    |
| %FORMAT(10I8)                    |    |     |     |    |    |    |     |     |    |
| 0                                | 3  | 33  | 2   | 3  | 0  | 30 | 6   | 6   | 3  |
| 33                               | 8  | 12  | 21  | 36 | 14 | 15 | 0   | 30  | 16 |
| 21                               | 24 | 39  | 19  | 24 | 21 | 36 | 14  | 27  | 24 |
| 39                               | 8  |     |     |    |    |    |     |     |    |
| %FLAG ANGLES_WITHOUT_HYDROGEN    |    |     |     |    |    |    |     |     |    |
| %FORMAT(10I8)                    |    |     |     |    |    |    |     |     |    |
| 0                                | 3  | 6   | 1   | 0  | 15 | 12 | 3   | 0   | 15 |
| 18                               | 4  | 3   | 0   | 15 | 5  | 3  | 6   | 9   | 7  |
| 6                                | 9  | 12  | 9   | 6  | 9  | 27 | 10  | 9   | 12 |
| 21                               | 11 | 9   | 12  | 15 | 12 | 9  | 27  | 24  | 7  |
| 12                               | 9  | 27  | 9   | 12 | 21 | 24 | 13  | 12  | 15 |
| 18                               | 15 | 15  | 12  | 21 | 17 | 21 | 24  | 27  | 18 |
| %FLAG DIHEDRALS_INC_HYDROGEN     |    |     |     |    |    |    |     |     |    |
| %FORMAT(10I8)                    |    |     |     |    |    |    |     |     |    |
| 30                               | 0  | 3   | 6   | 4  | 9  | 6  | 3   | 33  | 1  |
| 9                                | 12 | 21  | 36  | 6  | 9  | 27 | 24  | 39  | 1  |
| 12                               | 21 | 24  | 39  | 6  | 30 | 0  | 15  | 12  | 3  |
| 15                               | 0  | 3   | 33  | 4  | 15 | 12 | 21  | 36  | 6  |
| 30                               | 0  | 15  | 18  | 7  | 30 | 0  | -15 | 18  | 3  |
| 27                               | 24 | 21  | 36  | 6  | 30 | 0  | 3   | 33  | 4  |
| 36                               | 21 | 24  | 39  | 6  | 30 | 0  | -3  | -15 | 8  |
| 33                               | 0  | -3  | -6  | 8  | 12 | 24 | -21 | -36 | 8  |
| 39                               | 21 | -24 | -27 | 8  |    |    |     |     |    |
| %FLAG DIHEDRALS_WITHOUT_HYDROGEN |    |     |     |    |    |    |     |     |    |
| %FORMAT(10I8)                    |    |     |     |    |    |    |     |     |    |
| 0                                | 3  | 6   | 9   | 1  | 0  | 15 | -12 | 9   | 2  |
| 0                                | 15 | 12  | 21  | 2  | 3  | 0  | 15  | 12  | 3  |
| 3                                | 0  | 15  | 18  | 3  | 3  | 6  | -9  | 12  | 1  |
| 3                                | 6  | 9   | 27  | 1  | 15 | 0  | 3   | 6   | 4  |
| 6                                | 9  | 12  | 21  | 5  | 6  | 9  | -12 | 15  | 5  |
| 6                                | 9  | 27  | 24  | 1  | 9  | 12 | -21 | 24  | 6  |
| 9                                | 12 | 15  | 18  | 2  | 9  | 27 | -24 | 21  | 1  |
| 12                               | 9  | -27 | 24  | 1  | 12 | 21 | -24 | 27  | 6  |
| 15                               | 12 | 9   | 27  | 5  | 15 | 12 | 21  | 24  | 6  |
| 18                               | 15 | 12  | 21  | 2  | 21 | 12 | -9  | 27  | 5  |
| 12                               | 6  | -9  | -27 | 8  | 15 | 9  | -12 | -21 | 8  |

```

12      0    -15   -18      9
%FLAG EXCLUDED_ATOMS_LIST
%FORMAT(10I8)
  2      3      4      5      6      7      8      11      12      3
  4      5      6      7     10     11     12      4      5      6
  8      9     10     11     12      5      6      7      8      9
 10     12     13     14      6      7      8      9     10     11
 13     14      7      8      9     10     11     12     13      8
 11      9     10     13     14     10     13     14     13     14
 12      0     14      0
%FLAG HBOND_ACOEF
%FORMAT(5E16.8)

%FLAG HBOND_BCOEF
%FORMAT(5E16.8)

%FLAG HBCUT
%FORMAT(5E16.8)

%FLAG AMBER_ATOM_TYPE
%FORMAT(20a4)
n  cc nd cd cc c  o  na cc nd hn h5 hn h5
%FLAG TREE_CHAIN_CLASSIFICATION
%FORMAT(20a4)
BLA BLA
%FLAG JOIN_ARRAY
%FORMAT(10I8)
  0      0      0      0      0      0      0      0      0      0
  0      0      0      0
%FLAG IROTAT
%FORMAT(10I8)
  0      0      0      0      0      0      0      0      0      0
  0      0      0      0
%FLAG RADIUS_SET
%FORMAT(1a80)
modified Bondi radii (mbondi)
%FLAG RADII
%FORMAT(5E16.8)
 1.55000000E+00  1.70000000E+00  1.55000000E+00  1.70000000E+00  1.70000000E+00
 1.70000000E+00  1.50000000E+00  1.55000000E+00  1.70000000E+00  1.55000000E+00

```

```

1.3000000E+00 1.3000000E+00 1.3000000E+00 1.3000000E+00
%FLAG SCREEN
%FORMAT(5E16.8)
7.9000000E-01 7.2000000E-01 7.9000000E-01 7.2000000E-01 7.2000000E-01
7.2000000E-01 8.5000000E-01 7.9000000E-01 7.2000000E-01 7.9000000E-01
8.5000000E-01 8.5000000E-01 8.5000000E-01 8.5000000E-01
%FLAG IPOL
%FORMAT(1I8)
0

```

**File S2. Force field parameters of 6AP for Amber**

```

%VERSION VERSION_STAMP = V0001.000 DATE = 06/13/18 10:13:21
%FLAG TITLE
%FORMAT(20a4)
6AP
%FLAG POINTERS
%FORMAT(10I8)
17 6 6 12 10 17 18 26 0 0
76 1 12 17 26 10 18 7 8 0
0 0 0 0 0 0 0 0 17 0
0
%FLAG ATOM_NAME
%FORMAT(20a4)
N1 C2 N2 N3 C4 C5 C6 N6 N7 C8 N9 H1 H2 H3 H4 H5 H6
%FLAG CHARGE
%FORMAT(5E16.8)
-1.53613989E+01 1.67626938E+01 -1.68829610E+01 -1.44867285E+01 8.97994944E+00
-4.92366546E+00 1.43810392E+01 -1.74296300E+01 -9.71430813E+00 7.06478571E+00
-7.07025240E+00 7.74083304E+00 7.74083304E+00 8.08705674E+00 8.08705674E+00
1.29013884E+00 5.75278011E+00
%FLAG ATOMIC_NUMBER
%FORMAT(10I8)
7 6 7 7 6 6 6 7 7 6
7 1 1 1 1 1 1 1 1
%FLAG MASS
%FORMAT(5E16.8)
1.4010000E+01 1.2010000E+01 1.4010000E+01 1.4010000E+01 1.2010000E+01
1.2010000E+01 1.2010000E+01 1.4010000E+01 1.4010000E+01 1.2010000E+01

```

```

1.40100000E+01 1.00800000E+00 1.00800000E+00 1.00800000E+00 1.00800000E+00
1.00800000E+00 1.00800000E+00
%FLAG ATOM_TYPE_INDEX
%FORMAT(10I8)
      1      2      3      1      2      2      2      3      1      2
      4      5      5      5      5      6      5
%FLAG NUMBER_EXCLUDED_ATOMS
%FORMAT(10I8)
      12      9      5      9      8      9      6      3      4      3
      2      1      1      1      1      1      1
%FLAG NONBONDED_PARM_INDEX
%FORMAT(10I8)
      1      2      4      7      11      16      2      3      5      8
      12      17      4      5      6      9      13      18      7      8
      9      10      14      19      11      12      13      14      15      20
      16      17      18      19      20      21
%FLAG RESIDUE_LABEL
%FORMAT(20a4)
6AP
%FLAG RESIDUE_POINTER
%FORMAT(10I8)
      1
%FLAG BOND_FORCE_CONSTANT
%FORMAT(5E16.8)
      4.14240000E+02 3.47060000E+02 5.29460000E+02 3.78570000E+02 3.49520000E+02
      3.94620000E+02 4.50710000E+02 3.54490000E+02 4.03680000E+02 5.35140000E+02
%FLAG BOND_EQUIL_VALUE
%FORMAT(5E16.8)
      1.33900000E+00 1.38600000E+00 1.01200000E+00 1.39800000E+00 1.38400000E+00
      1.35200000E+00 1.31700000E+00 1.38000000E+00 1.08200000E+00 1.01000000E+00
%FLAG ANGLE_FORCE_CONSTANT
%FORMAT(5E16.8)
      1.12063000E+02 1.09369000E+02 8.68490000E+01 7.03560000E+01 4.87870000E+01
      1.07575000E+02 6.87670000E+01 8.76350000E+01 6.93770000E+01 4.69790000E+01
      8.71670000E+01 8.61630000E+01 7.46080000E+01 1.15504000E+02 6.24620000E+01
      4.71010000E+01 6.12270000E+01 3.95190000E+01
%FLAG ANGLE_EQUIL_VALUE
%FORMAT(5E16.8)
      2.04098890E+00 2.22110696E+00 2.14570870E+00 2.04587583E+00 2.02580453E+00
      2.21813990E+00 2.09474507E+00 2.08950908E+00 1.97484090E+00 2.19108728E+00

```



|                               |                |                |                |                |
|-------------------------------|----------------|----------------|----------------|----------------|
| 2.06542352E+00                | 2.11097664E+00 | 1.83050210E+00 | 1.95860933E+00 | 2.19073822E+00 |
| 2.19038915E+00                | 2.12144862E+00 | 2.00922390E+00 |                |                |
| %FLAG DIHEDRAL_FORCE_CONSTANT |                |                |                |                |
| %FORMAT(5E16.8)               |                |                |                |                |
| 1.05000000E+00                | 4.80000000E+00 | 3.62500000E+00 | 3.00000000E-01 | 1.70000000E+00 |
| 4.75000000E+00                | 1.10000000E+00 |                |                |                |
| %FLAG DIHEDRAL_PERIODICITY    |                |                |                |                |
| %FORMAT(5E16.8)               |                |                |                |                |
| 2.00000000E+00                | 2.00000000E+00 | 2.00000000E+00 | 2.00000000E+00 | 2.00000000E+00 |
| 2.00000000E+00                | 2.00000000E+00 |                |                |                |
| %FLAG DIHEDRAL_PHASE          |                |                |                |                |
| %FORMAT(5E16.8)               |                |                |                |                |
| 3.14159400E+00                | 3.14159400E+00 | 3.14159400E+00 | 3.14159400E+00 | 3.14159400E+00 |
| 3.14159400E+00                | 3.14159400E+00 |                |                |                |
| %FLAG SCCE_SCALE_FACTOR       |                |                |                |                |
| %FORMAT(5E16.8)               |                |                |                |                |
| 1.20000000E+00                | 1.20000000E+00 | 1.20000000E+00 | 1.20000000E+00 | 1.20000000E+00 |
| 1.20000000E+00                | 0.00000000E+00 |                |                |                |
| %FLAG SCNB_SCALE_FACTOR       |                |                |                |                |
| %FORMAT(5E16.8)               |                |                |                |                |
| 2.00000000E+00                | 2.00000000E+00 | 2.00000000E+00 | 2.00000000E+00 | 2.00000000E+00 |
| 2.00000000E+00                | 0.00000000E+00 |                |                |                |
| %FLAG SOLTY                   |                |                |                |                |
| %FORMAT(5E16.8)               |                |                |                |                |
| 0.00000000E+00                | 0.00000000E+00 | 0.00000000E+00 | 0.00000000E+00 | 0.00000000E+00 |
| 0.00000000E+00                | 0.00000000E+00 | 0.00000000E+00 |                |                |
| %FLAG LENNARD_JONES_ACOEF     |                |                |                |                |
| %FORMAT(5E16.8)               |                |                |                |                |
| 8.49322032E+05                | 7.69642101E+05 | 6.96551276E+05 | 9.05243612E+05 | 8.17329084E+05 |
| 9.54790629E+05                | 9.08092643E+05 | 8.20152428E+05 | 9.58637891E+05 | 9.62429652E+05 |
| 2.01475241E+03                | 1.71458823E+03 | 1.79157166E+03 | 1.82491629E+03 | 1.34728399E-01 |
| 5.87815925E+04                | 5.22195041E+04 | 5.91752946E+04 | 5.96470418E+04 | 5.02830284E+01 |
| 2.97255425E+03                |                |                |                |                |
| %FLAG LENNARD_JONES_BCOEF     |                |                |                |                |
| %FORMAT(5E16.8)               |                |                |                |                |
| 5.65406768E+02                | 5.44830041E+02 | 5.24668528E+02 | 7.17661669E+02 | 6.90283231E+02 |
| 9.06156687E+02                | 7.09588248E+02 | 6.82622272E+02 | 8.96356641E+02 | 8.86629877E+02 |
| 1.57231024E+01                | 1.46824710E+01 | 1.82287422E+01 | 1.81620725E+01 | 7.34107347E-02 |
| 9.56653235E+01                | 9.12729468E+01 | 1.18009316E+02 | 1.16962018E+02 | 1.59752321E+00 |
| 1.38359132E+01                |                |                |                |                |

%FLAG BONDS\_INC\_HYDROGEN

%FORMAT(10I8)

|    |    |    |    |    |    |    |    |   |    |
|----|----|----|----|----|----|----|----|---|----|
| 6  | 33 | 3  | 6  | 36 | 3  | 21 | 39 | 3 | 21 |
| 42 | 3  | 27 | 45 | 9  | 30 | 48 | 10 |   |    |

%FLAG BONDS\_WITHOUT\_HYDROGEN

%FORMAT(10I8)

|    |    |    |    |    |    |    |    |    |    |
|----|----|----|----|----|----|----|----|----|----|
| 0  | 3  | 1  | 0  | 18 | 1  | 3  | 6  | 2  | 3  |
| 9  | 1  | 9  | 12 | 1  | 12 | 15 | 4  | 12 | 30 |
| 5  | 15 | 18 | 4  | 15 | 24 | 6  | 18 | 21 | 2  |
| 24 | 27 | 7  | 27 | 30 | 8  |    |    |    |    |

%FLAG ANGLES\_INC\_HYDROGEN

%FORMAT(10I8)

|    |    |    |    |    |    |    |    |    |    |
|----|----|----|----|----|----|----|----|----|----|
| 3  | 6  | 33 | 5  | 3  | 6  | 36 | 5  | 12 | 30 |
| 48 | 10 | 18 | 21 | 39 | 5  | 18 | 21 | 42 | 5  |
| 24 | 27 | 45 | 15 | 27 | 30 | 48 | 16 | 30 | 27 |
| 45 | 17 | 33 | 6  | 36 | 18 | 39 | 21 | 42 | 18 |

%FLAG ANGLES\_WITHOUT\_HYDROGEN

%FORMAT(10I8)

|    |    |    |    |    |    |    |    |    |    |
|----|----|----|----|----|----|----|----|----|----|
| 0  | 3  | 6  | 1  | 0  | 3  | 9  | 2  | 0  | 18 |
| 15 | 3  | 0  | 18 | 21 | 1  | 3  | 0  | 18 | 4  |
| 3  | 9  | 12 | 4  | 6  | 3  | 9  | 1  | 9  | 12 |
| 15 | 3  | 9  | 12 | 30 | 6  | 12 | 15 | 18 | 7  |
| 12 | 15 | 24 | 8  | 12 | 30 | 27 | 9  | 15 | 12 |
| 30 | 11 | 15 | 18 | 21 | 12 | 15 | 24 | 27 | 13 |
| 18 | 15 | 24 | 8  | 24 | 27 | 30 | 14 |    |    |

%FLAG DIHEDRALS\_INC\_HYDROGEN

%FORMAT(10I8)

|    |    |     |     |   |    |    |     |     |   |
|----|----|-----|-----|---|----|----|-----|-----|---|
| 0  | 3  | 6   | 33  | 1 | 0  | 3  | 6   | 36  | 1 |
| 0  | 18 | 21  | 39  | 1 | 0  | 18 | 21  | 42  | 1 |
| 9  | 3  | 6   | 33  | 1 | 9  | 3  | 6   | 36  | 1 |
| 9  | 12 | 30  | 48  | 4 | 12 | 30 | 27  | 45  | 5 |
| 15 | 12 | 30  | 48  | 4 | 15 | 18 | 21  | 39  | 1 |
| 15 | 18 | 21  | 42  | 1 | 15 | 24 | 27  | 45  | 6 |
| 24 | 27 | 30  | 48  | 5 | 45 | 27 | 30  | 48  | 5 |
| 3  | 33 | -6  | -36 | 7 | 18 | 39 | -21 | -42 | 7 |
| 45 | 30 | -27 | -24 | 7 | 12 | 27 | -30 | -48 | 7 |

%FLAG DIHEDRALS\_WITHOUT\_HYDROGEN

%FORMAT(10I8)

|   |    |    |    |   |   |    |     |    |   |
|---|----|----|----|---|---|----|-----|----|---|
| 0 | 3  | 9  | 12 | 2 | 0 | 18 | -15 | 12 | 3 |
| 0 | 18 | 15 | 24 | 3 | 3 | 0  | 18  | 15 | 2 |



```

%FLAG IROTAT
%FORMAT(10I8)
      0      0      0      0      0      0      0      0      0      0
      0      0      0      0      0      0      0
%FLAG RADIUS_SET
%FORMAT(1a80)
modified Bondi radii (mbondi)
%FLAG RADII
%FORMAT(5E16.8)
  1.55000000E+00  1.70000000E+00  1.55000000E+00  1.55000000E+00  1.70000000E+00
  1.70000000E+00  1.70000000E+00  1.55000000E+00  1.55000000E+00  1.70000000E+00
  1.55000000E+00  1.30000000E+00  1.30000000E+00  1.30000000E+00  1.30000000E+00
  1.30000000E+00  1.30000000E+00
%FLAG SCREEN
%FORMAT(5E16.8)
  7.90000000E-01  7.20000000E-01  7.90000000E-01  7.90000000E-01  7.20000000E-01
  7.20000000E-01  7.20000000E-01  7.90000000E-01  7.90000000E-01  7.20000000E-01
  7.90000000E-01  8.50000000E-01  8.50000000E-01  8.50000000E-01  8.50000000E-01
  8.50000000E-01  8.50000000E-01
%FLAG IPOL
%FORMAT(1I8)
      0

```

### File S3. Force field parameters of HPA for Gromacs:

; lig.top created by rdparm2gmx.pl 2018 年 02 月 05 日 星期一 19:51:02 CST

```

; Include forcefield parameters
#include "amber99sb-ildn.ff/forcefield.itp"

```

```

;[ defaults ]
;nbfunc      comb-rule      gen-pairs      fudgeLJ fudgeQQ
;1           2             yes           0.5      0.8333

[ atomtypes ]
;name  bond_type  mass  charge  ptype      sigma      epsilon
o      o          0.0000  0.0000  A          2.95992e-01  8.78640e-01
n      n          0.0000  0.0000  A          3.25000e-01  7.11280e-01
hn     hn          0.0000  0.0000  A          1.06908e-01  6.56888e-02

```

|    |    |        |        |   |             |             |
|----|----|--------|--------|---|-------------|-------------|
| c  | c  | 0.0000 | 0.0000 | A | 3.39967e-01 | 3.59824e-01 |
| cd | cd | 0.0000 | 0.0000 | A | 3.39967e-01 | 3.59824e-01 |
| nd | nd | 0.0000 | 0.0000 | A | 3.25000e-01 | 7.11280e-01 |
| cc | cc | 0.0000 | 0.0000 | A | 3.39967e-01 | 3.59824e-01 |
| na | na | 0.0000 | 0.0000 | A | 3.25000e-01 | 7.11280e-01 |
| h5 | h5 | 0.0000 | 0.0000 | A | 2.42146e-01 | 6.27600e-02 |

[ moleculetype ]

```
;Name          nrexcl
  HPA              3
```

[ atoms ]

| ; | nr | type | resnr | residue | atom | cgnr | charge   | mass      | typeB | chargeB |
|---|----|------|-------|---------|------|------|----------|-----------|-------|---------|
|   | 1  | n    | 1     | HPA     | N1   | 1    | -0.48540 | 14.000000 |       |         |
|   | 2  | cc   | 1     | HPA     | C2   | 2    | 0.46980  | 12.000000 |       |         |
|   | 3  | nd   | 1     | HPA     | N3   | 3    | -0.62870 | 14.000000 |       |         |
|   | 4  | cd   | 1     | HPA     | C4   | 4    | 0.55330  | 12.000000 |       |         |
|   | 5  | cc   | 1     | HPA     | C5   | 5    | -0.32820 | 12.000000 |       |         |
|   | 6  | c    | 1     | HPA     | C6   | 6    | 0.73310  | 12.000000 |       |         |
|   | 7  | o    | 1     | HPA     | O6   | 7    | -0.63350 | 16.000000 |       |         |
|   | 8  | na   | 1     | HPA     | N7   | 8    | -0.27690 | 14.000000 |       |         |
|   | 9  | cc   | 1     | HPA     | C8   | 9    | 0.43540  | 12.000000 |       |         |
|   | 10 | nd   | 1     | HPA     | N9   | 10   | -0.63300 | 14.000000 |       |         |
|   | 11 | hn   | 1     | HPA     | H1   | 11   | 0.34150  | 1.000000  |       |         |
|   | 12 | h5   | 1     | HPA     | H2   | 12   | 0.05880  | 1.000000  |       |         |
|   | 13 | hn   | 1     | HPA     | H3   | 13   | 0.32370  | 1.000000  |       |         |
|   | 14 | h5   | 1     | HPA     | H4   | 14   | 0.07010  | 1.000000  |       |         |

[ bonds ]

| ; | ai | aj | funct | r          | k          |
|---|----|----|-------|------------|------------|
|   | 1  | 11 | 1     | 1.0090e-01 | 3.4326e+05 |
|   | 2  | 12 | 1     | 1.0790e-01 | 2.9790e+05 |
|   | 8  | 13 | 1     | 1.0110e-01 | 3.4024e+05 |
|   | 9  | 14 | 1     | 1.0790e-01 | 2.9790e+05 |
|   | 1  | 2  | 1     | 1.3800e-01 | 3.5648e+05 |
|   | 1  | 6  | 1     | 1.3450e-01 | 4.0016e+05 |
|   | 2  | 3  | 1     | 1.3350e-01 | 4.1388e+05 |
|   | 3  | 4  | 1     | 1.3760e-01 | 3.6116e+05 |
|   | 4  | 10 | 1     | 1.3760e-01 | 3.6116e+05 |
|   | 4  | 5  | 1     | 1.3710e-01 | 4.2175e+05 |

|   |    |   |            |            |
|---|----|---|------------|------------|
| 5 | 8  | 1 | 1.3710e-01 | 3.6719e+05 |
| 5 | 6  | 1 | 1.4620e-01 | 3.1581e+05 |
| 6 | 7  | 1 | 1.2140e-01 | 5.4225e+05 |
| 8 | 9  | 1 | 1.3710e-01 | 3.6719e+05 |
| 9 | 10 | 1 | 1.3350e-01 | 4.1388e+05 |

[ pairs ]

| ; | ai | aj | funct |
|---|----|----|-------|
|   | 11 | 3  | 1     |
|   | 4  | 12 | 1     |
|   | 4  | 14 | 1     |
|   | 4  | 13 | 1     |
|   | 5  | 14 | 1     |
|   | 11 | 5  | 1     |
|   | 6  | 12 | 1     |
|   | 6  | 13 | 1     |
|   | 11 | 7  | 1     |
|   | 10 | 13 | 1     |
|   | 11 | 12 | 1     |
|   | 13 | 14 | 1     |
|   | 1  | 4  | 1     |
|   | 1  | 8  | 1     |
|   | 2  | 5  | 1     |
|   | 2  | 7  | 1     |
|   | 2  | 10 | 1     |
|   | 6  | 3  | 1     |
|   | 3  | 9  | 1     |
|   | 3  | 8  | 1     |
|   | 4  | 7  | 1     |
|   | 6  | 10 | 1     |
|   | 6  | 9  | 1     |
|   | 7  | 8  | 1     |

[ angles ]

| ; | ai | aj | ak | funct | theta      | cth        |
|---|----|----|----|-------|------------|------------|
|   | 1  | 2  | 12 | 1     | 1.1561e+02 | 4.2568e+02 |
|   | 2  | 1  | 11 | 1     | 1.1871e+02 | 4.0233e+02 |
|   | 3  | 2  | 12 | 1     | 1.2538e+02 | 4.1949e+02 |
|   | 5  | 8  | 13 | 1     | 1.2566e+02 | 3.9321e+02 |
|   | 6  | 1  | 11 | 1     | 1.1846e+02 | 4.1179e+02 |

|    |    |    |   |            |            |
|----|----|----|---|------------|------------|
| 8  | 9  | 14 | 1 | 1.2210e+02 | 4.1639e+02 |
| 9  | 8  | 13 | 1 | 1.2566e+02 | 3.9321e+02 |
| 10 | 9  | 14 | 1 | 1.2538e+02 | 4.1949e+02 |
| 1  | 2  | 3  | 1 | 1.2271e+02 | 5.9580e+02 |
| 1  | 6  | 5  | 1 | 1.1186e+02 | 5.8735e+02 |
| 1  | 6  | 7  | 1 | 1.2203e+02 | 6.3455e+02 |
| 2  | 1  | 6  | 1 | 1.2419e+02 | 5.4593e+02 |
| 2  | 3  | 4  | 1 | 1.0563e+02 | 5.9488e+02 |
| 3  | 4  | 10 | 1 | 1.2558e+02 | 5.8132e+02 |
| 3  | 4  | 5  | 1 | 1.1168e+02 | 6.0275e+02 |
| 4  | 10 | 9  | 1 | 1.0563e+02 | 5.9488e+02 |
| 4  | 5  | 8  | 1 | 1.0942e+02 | 6.1011e+02 |
| 4  | 5  | 6  | 1 | 1.2151e+02 | 5.4584e+02 |
| 5  | 4  | 10 | 1 | 1.1168e+02 | 6.0275e+02 |
| 5  | 8  | 9  | 1 | 1.0990e+02 | 5.7689e+02 |
| 5  | 6  | 7  | 1 | 1.2571e+02 | 5.7664e+02 |
| 6  | 5  | 8  | 1 | 1.1411e+02 | 5.8565e+02 |
| 8  | 9  | 10 | 1 | 1.1202e+02 | 6.2576e+02 |

[ dihedrals ]

| i  | j  | k | l  | funcC0 | ...      | C5       |           |         |         |         |         |   |
|----|----|---|----|--------|----------|----------|-----------|---------|---------|---------|---------|---|
| 11 | 1  | 2 | 3  | 3      | 13.80720 | 0.00000  | -13.80720 | 0.00000 | 0.00000 | 0.00000 | 0.00000 | ; |
| 4  | 3  | 2 | 12 | 3      | 39.74800 | 0.00000  | -39.74800 | 0.00000 | 0.00000 | 0.00000 | 0.00000 | ; |
| 4  | 10 | 9 | 14 | 3      | 39.74800 | 0.00000  | -39.74800 | 0.00000 | 0.00000 | 0.00000 | 0.00000 | ; |
| 4  | 5  | 8 | 13 | 3      | 14.22560 | 0.00000  | -14.22560 | 0.00000 | 0.00000 | 0.00000 | 0.00000 | ; |
| 5  | 8  | 9 | 14 | 3      | 14.22560 | 0.00000  | -14.22560 | 0.00000 | 0.00000 | 0.00000 | 0.00000 | ; |
| 11 | 1  | 6 | 5  | 3      | 20.92000 | 0.00000  | -20.92000 | 0.00000 | 0.00000 | 0.00000 | 0.00000 | ; |
| 6  | 1  | 2 | 12 | 3      | 13.80720 | 0.00000  | -13.80720 | 0.00000 | 0.00000 | 0.00000 | 0.00000 | ; |
| 6  | 5  | 8 | 13 | 3      | 14.22560 | 0.00000  | -14.22560 | 0.00000 | 0.00000 | 0.00000 | 0.00000 | ; |
| 11 | 1  | 6 | 7  | 3      | 29.28800 | -8.36800 | -20.92000 | 0.00000 | 0.00000 | 0.00000 | 0.00000 | ; |
| 10 | 9  | 8 | 13 | 3      | 14.22560 | 0.00000  | -14.22560 | 0.00000 | 0.00000 | 0.00000 | 0.00000 | ; |
| 11 | 1  | 2 | 12 | 3      | 13.80720 | 0.00000  | -13.80720 | 0.00000 | 0.00000 | 0.00000 | 0.00000 | ; |
| 13 | 8  | 9 | 14 | 3      | 14.22560 | 0.00000  | -14.22560 | 0.00000 | 0.00000 | 0.00000 | 0.00000 | ; |
| 11 | 1  | 2 | 6  | 3      | 9.20480  | 0.00000  | -9.20480  | 0.00000 | 0.00000 | 0.00000 | 0.00000 | ; |
| 12 | 1  | 2 | 3  | 3      | 9.20480  | 0.00000  | -9.20480  | 0.00000 | 0.00000 | 0.00000 | 0.00000 | ; |
| 5  | 9  | 8 | 13 | 3      | 9.20480  | 0.00000  | -9.20480  | 0.00000 | 0.00000 | 0.00000 | 0.00000 | ; |
| 14 | 8  | 9 | 10 | 3      | 9.20480  | 0.00000  | -9.20480  | 0.00000 | 0.00000 | 0.00000 | 0.00000 | ; |
| 1  | 2  | 3 | 4  | 3      | 39.74800 | 0.00000  | -39.74800 | 0.00000 | 0.00000 | 0.00000 | 0.00000 | ; |
| 1  | 6  | 5 | 4  | 3      | 24.05800 | 0.00000  | -24.05800 | 0.00000 | 0.00000 | 0.00000 | 0.00000 | ; |
| 1  | 6  | 5 | 8  | 3      | 24.05800 | 0.00000  | -24.05800 | 0.00000 | 0.00000 | 0.00000 | 0.00000 | ; |

|   |    |    |    |   |          |         |           |         |         |         |   |
|---|----|----|----|---|----------|---------|-----------|---------|---------|---------|---|
| 2 | 1  | 6  | 5  | 3 | 20.92000 | 0.00000 | -20.92000 | 0.00000 | 0.00000 | 0.00000 | ; |
| 2 | 1  | 6  | 7  | 3 | 20.92000 | 0.00000 | -20.92000 | 0.00000 | 0.00000 | 0.00000 | ; |
| 2 | 3  | 4  | 10 | 3 | 39.74800 | 0.00000 | -39.74800 | 0.00000 | 0.00000 | 0.00000 | ; |
| 2 | 3  | 4  | 5  | 3 | 39.74800 | 0.00000 | -39.74800 | 0.00000 | 0.00000 | 0.00000 | ; |
| 6 | 1  | 2  | 3  | 3 | 13.80720 | 0.00000 | -13.80720 | 0.00000 | 0.00000 | 0.00000 | ; |
| 3 | 4  | 10 | 9  | 3 | 39.74800 | 0.00000 | -39.74800 | 0.00000 | 0.00000 | 0.00000 | ; |
| 3 | 4  | 5  | 8  | 3 | 33.47200 | 0.00000 | -33.47200 | 0.00000 | 0.00000 | 0.00000 | ; |
| 3 | 4  | 5  | 6  | 3 | 33.47200 | 0.00000 | -33.47200 | 0.00000 | 0.00000 | 0.00000 | ; |
| 4 | 10 | 9  | 8  | 3 | 39.74800 | 0.00000 | -39.74800 | 0.00000 | 0.00000 | 0.00000 | ; |
| 4 | 5  | 8  | 9  | 3 | 14.22560 | 0.00000 | -14.22560 | 0.00000 | 0.00000 | 0.00000 | ; |
| 4 | 5  | 6  | 7  | 3 | 24.05800 | 0.00000 | -24.05800 | 0.00000 | 0.00000 | 0.00000 | ; |
| 5 | 4  | 10 | 9  | 3 | 39.74800 | 0.00000 | -39.74800 | 0.00000 | 0.00000 | 0.00000 | ; |
| 5 | 8  | 9  | 10 | 3 | 14.22560 | 0.00000 | -14.22560 | 0.00000 | 0.00000 | 0.00000 | ; |
| 6 | 5  | 4  | 10 | 3 | 33.47200 | 0.00000 | -33.47200 | 0.00000 | 0.00000 | 0.00000 | ; |
| 6 | 5  | 8  | 9  | 3 | 14.22560 | 0.00000 | -14.22560 | 0.00000 | 0.00000 | 0.00000 | ; |
| 7 | 6  | 5  | 8  | 3 | 24.05800 | 0.00000 | -24.05800 | 0.00000 | 0.00000 | 0.00000 | ; |
| 8 | 5  | 4  | 10 | 3 | 33.47200 | 0.00000 | -33.47200 | 0.00000 | 0.00000 | 0.00000 | ; |
| 5 | 3  | 4  | 10 | 3 | 9.20480  | 0.00000 | -9.20480  | 0.00000 | 0.00000 | 0.00000 | ; |
| 6 | 4  | 5  | 8  | 3 | 9.20480  | 0.00000 | -9.20480  | 0.00000 | 0.00000 | 0.00000 | ; |
| 5 | 1  | 6  | 7  | 3 | 87.86400 | 0.00000 | -87.86400 | 0.00000 | 0.00000 | 0.00000 | ; |

; Include Position restraint file

#ifdef POSRES

#include "posre.itp"

#endif

; Include water topology

#include "amber99sb-ildn.ff/tip3p.itp"

#ifdef POSRES\_WATER

; Position restraint for each water oxygen

[ position\_restraints ]

; i funct fcx fcy fcz  
1 1 1000 1000 1000

#endif

; Include topology for ions

#include "amber99sb-ildn.ff/ions.itp"



```
[ system ]
14 system in water
```

```
[ molecules ]
; Compound      nmols
HPA              1
SOL             689
NA               2
CL              2
```

#### File S4. Force field parameters of 6AP for Gromacs:

```
; lig.top created by rdparm2gmx.pl 2018 年 02 月 09 日 星期五 06:28:23 CST
```

```
; Include forcefield parameters
#include "amber99sb-ildn.ff/forcefield.itp"
```

```
:[ defaults ]
; nbfunc      comb-rule      gen-pairs      fudgeLJ fudgeQQ
; 1           2              yes            0.5      0.8333
```

```
[ atomtypes ]
; name  bond_type  mass  charge  ptype  sigma  epsilon
nd      nd         0.0000 0.0000 A    3.25000e-01 7.11280e-01
cc      cc         0.0000 0.0000 A    3.39967e-01 3.59824e-01
nh      nh         0.0000 0.0000 A    3.25000e-01 7.11280e-01
hn      hn         0.0000 0.0000 A    1.06908e-01 6.56888e-02
nb      nb         0.0000 0.0000 A    3.25000e-01 7.11280e-01
na      na         0.0000 0.0000 A    3.25000e-01 7.11280e-01
ca      ca         0.0000 0.0000 A    3.39967e-01 3.59824e-01
h5      h5         0.0000 0.0000 A    2.42146e-01 6.27600e-02
```

```
[ moleculetype ]
; Name      nrexcl
6AP        3
```

[ atoms ]

| ; | nr | type | resnr | residue | atom | cgnr | charge   | mass      | typeB | chargeB |
|---|----|------|-------|---------|------|------|----------|-----------|-------|---------|
|   | 1  | na   | 1     | 6AP     | N9   | 1    | -0.38800 | 14.000000 |       |         |
|   | 2  | cc   | 1     | 6AP     | C8   | 2    | 0.38770  | 12.000000 |       |         |
|   | 3  | nd   | 1     | 6AP     | N7   | 3    | -0.53310 | 14.000000 |       |         |
|   | 4  | ca   | 1     | 6AP     | C5   | 4    | -0.27020 | 12.000000 |       |         |
|   | 5  | ca   | 1     | 6AP     | C4   | 5    | 0.49280  | 12.000000 |       |         |
|   | 6  | nb   | 1     | 6AP     | N3   | 6    | -0.79500 | 14.000000 |       |         |
|   | 7  | ca   | 1     | 6AP     | C2   | 7    | 0.91990  | 12.000000 |       |         |
|   | 8  | nh   | 1     | 6AP     | N2   | 8    | -0.92650 | 14.000000 |       |         |
|   | 9  | nb   | 1     | 6AP     | N1   | 9    | -0.84300 | 14.000000 |       |         |
|   | 10 | ca   | 1     | 6AP     | C6   | 10   | 0.78920  | 12.000000 |       |         |
|   | 11 | nh   | 1     | 6AP     | N6   | 11   | -0.95750 | 14.000000 |       |         |
|   | 12 | hn   | 1     | 6AP     | H1   | 12   | 0.31570  | 1.000000  |       |         |
|   | 13 | h5   | 1     | 6AP     | H2   | 13   | 0.07080  | 1.000000  |       |         |
|   | 14 | hn   | 1     | 6AP     | H3   | 14   | 0.42480  | 1.000000  |       |         |
|   | 15 | hn   | 1     | 6AP     | H4   | 15   | 0.42480  | 1.000000  |       |         |
|   | 16 | hn   | 1     | 6AP     | H5   | 16   | 0.44380  | 1.000000  |       |         |
|   | 17 | hn   | 1     | 6AP     | H6   | 17   | 0.44380  | 1.000000  |       |         |

[ bonds ]

| ; | ai | aj | funct | r          | k          |
|---|----|----|-------|------------|------------|
|   | 1  | 12 | 1     | 1.0110e-01 | 3.4024e+05 |
|   | 2  | 13 | 1     | 1.0790e-01 | 2.9790e+05 |
|   | 8  | 14 | 1     | 1.0140e-01 | 3.3572e+05 |
|   | 8  | 15 | 1     | 1.0140e-01 | 3.3572e+05 |
|   | 11 | 16 | 1     | 1.0140e-01 | 3.3572e+05 |
|   | 11 | 17 | 1     | 1.0140e-01 | 3.3572e+05 |
|   | 1  | 5  | 1     | 1.3500e-01 | 3.9355e+05 |
|   | 1  | 2  | 1     | 1.3710e-01 | 3.6719e+05 |
|   | 2  | 3  | 1     | 1.3350e-01 | 4.1388e+05 |
|   | 3  | 4  | 1     | 1.3360e-01 | 4.1246e+05 |
|   | 4  | 5  | 1     | 1.3870e-01 | 4.0033e+05 |
|   | 4  | 10 | 1     | 1.3870e-01 | 4.0033e+05 |
|   | 5  | 6  | 1     | 1.3420e-01 | 4.0426e+05 |
|   | 6  | 7  | 1     | 1.3420e-01 | 4.0426e+05 |
|   | 7  | 8  | 1     | 1.3640e-01 | 3.7572e+05 |
|   | 7  | 9  | 1     | 1.3420e-01 | 4.0426e+05 |
|   | 9  | 10 | 1     | 1.3420e-01 | 4.0426e+05 |
|   | 10 | 11 | 1     | 1.3640e-01 | 3.7572e+05 |

[ pairs ]

```
; ai    aj funct
 12     3     1
  4     13    1
 12     4     1
  4     16    1
  4     17    1
  5     13    1
 12     6     1
  6     14    1
  6     15    1
  9     14    1
  9     15    1
  9     16    1
  9     17    1
 12     13    1
  1     10    1
  1     7     1
  2     6     1
  2     10    1
  3     6     1
  3     9     1
  3     11    1
  4     7     1
  5     9     1
  5     11    1
  5     8     1
  6     10    1
  7     11    1
  8     10    1
```

[ angles ]

```
; ai    aj    ak funct  theta   cth
  1     2     13     1  1.2210e+02  4.1639e+02
  2     1     12     1  1.2566e+02  3.9321e+02
  3     2     13     1  1.2538e+02  4.1949e+02
  5     1     12     1  1.2559e+02  3.9857e+02
  7     8     14     1  1.1613e+02  4.1070e+02
  7     8     15     1  1.1613e+02  4.1070e+02
```

|    |    |    |   |            |            |
|----|----|----|---|------------|------------|
| 10 | 11 | 16 | 1 | 1.1613e+02 | 4.1070e+02 |
| 10 | 11 | 17 | 1 | 1.1613e+02 | 4.1070e+02 |
| 14 | 8  | 15 | 1 | 1.1485e+02 | 3.3514e+02 |
| 16 | 11 | 17 | 1 | 1.1485e+02 | 3.3514e+02 |
| 1  | 5  | 4  | 1 | 1.1834e+02 | 5.8752e+02 |
| 1  | 5  | 6  | 1 | 1.2707e+02 | 5.9078e+02 |
| 1  | 2  | 3  | 1 | 1.1202e+02 | 6.2576e+02 |
| 2  | 1  | 5  | 1 | 1.1315e+02 | 5.7287e+02 |
| 2  | 3  | 4  | 1 | 1.0547e+02 | 6.0450e+02 |
| 3  | 4  | 5  | 1 | 1.1972e+02 | 5.8693e+02 |
| 3  | 4  | 10 | 1 | 1.1972e+02 | 5.8693e+02 |
| 4  | 5  | 6  | 1 | 1.2263e+02 | 5.7873e+02 |
| 4  | 10 | 9  | 1 | 1.2263e+02 | 5.7873e+02 |
| 4  | 10 | 11 | 1 | 1.2013e+02 | 5.8024e+02 |
| 5  | 4  | 10 | 1 | 1.1997e+02 | 5.6216e+02 |
| 5  | 6  | 7  | 1 | 1.1586e+02 | 5.7396e+02 |
| 6  | 7  | 8  | 1 | 1.1695e+02 | 6.1254e+02 |
| 6  | 7  | 9  | 1 | 1.2719e+02 | 5.9229e+02 |
| 7  | 9  | 10 | 1 | 1.1586e+02 | 5.7396e+02 |
| 8  | 7  | 9  | 1 | 1.1695e+02 | 6.1254e+02 |
| 9  | 10 | 11 | 1 | 1.1695e+02 | 6.1254e+02 |

[ dihedrals ]

| i  | j  | k  | l  | funcC0 | ...      | C5      |           |         |         |         |         |   |
|----|----|----|----|--------|----------|---------|-----------|---------|---------|---------|---------|---|
| 12 | 1  | 2  | 3  | 3      | 14.22560 | 0.00000 | -14.22560 | 0.00000 | 0.00000 | 0.00000 | 0.00000 | ; |
| 4  | 3  | 2  | 13 | 3      | 39.74800 | 0.00000 | -39.74800 | 0.00000 | 0.00000 | 0.00000 | 0.00000 | ; |
| 12 | 1  | 5  | 4  | 3      | 2.51040  | 0.00000 | -2.51040  | 0.00000 | 0.00000 | 0.00000 | 0.00000 | ; |
| 4  | 10 | 11 | 16 | 3      | 8.78640  | 0.00000 | -8.78640  | 0.00000 | 0.00000 | 0.00000 | 0.00000 | ; |
| 4  | 10 | 11 | 17 | 3      | 8.78640  | 0.00000 | -8.78640  | 0.00000 | 0.00000 | 0.00000 | 0.00000 | ; |
| 5  | 1  | 2  | 13 | 3      | 14.22560 | 0.00000 | -14.22560 | 0.00000 | 0.00000 | 0.00000 | 0.00000 | ; |
| 12 | 1  | 5  | 6  | 3      | 2.51040  | 0.00000 | -2.51040  | 0.00000 | 0.00000 | 0.00000 | 0.00000 | ; |
| 6  | 7  | 8  | 14 | 3      | 8.78640  | 0.00000 | -8.78640  | 0.00000 | 0.00000 | 0.00000 | 0.00000 | ; |
| 6  | 7  | 8  | 15 | 3      | 8.78640  | 0.00000 | -8.78640  | 0.00000 | 0.00000 | 0.00000 | 0.00000 | ; |
| 9  | 7  | 8  | 14 | 3      | 8.78640  | 0.00000 | -8.78640  | 0.00000 | 0.00000 | 0.00000 | 0.00000 | ; |
| 9  | 7  | 8  | 15 | 3      | 8.78640  | 0.00000 | -8.78640  | 0.00000 | 0.00000 | 0.00000 | 0.00000 | ; |
| 9  | 10 | 11 | 16 | 3      | 8.78640  | 0.00000 | -8.78640  | 0.00000 | 0.00000 | 0.00000 | 0.00000 | ; |
| 9  | 10 | 11 | 17 | 3      | 8.78640  | 0.00000 | -8.78640  | 0.00000 | 0.00000 | 0.00000 | 0.00000 | ; |
| 12 | 1  | 2  | 13 | 3      | 14.22560 | 0.00000 | -14.22560 | 0.00000 | 0.00000 | 0.00000 | 0.00000 | ; |
| 12 | 1  | 2  | 5  | 3      | 9.20480  | 0.00000 | -9.20480  | 0.00000 | 0.00000 | 0.00000 | 0.00000 | ; |
| 13 | 1  | 2  | 3  | 3      | 9.20480  | 0.00000 | -9.20480  | 0.00000 | 0.00000 | 0.00000 | 0.00000 | ; |

|    |    |    |    |   |          |         |           |         |         |         |   |
|----|----|----|----|---|----------|---------|-----------|---------|---------|---------|---|
| 7  | 14 | 8  | 15 | 3 | 9.20480  | 0.00000 | -9.20480  | 0.00000 | 0.00000 | 0.00000 | ; |
| 10 | 16 | 11 | 17 | 3 | 9.20480  | 0.00000 | -9.20480  | 0.00000 | 0.00000 | 0.00000 | ; |
| 1  | 5  | 4  | 3  | 3 | 30.33400 | 0.00000 | -30.33400 | 0.00000 | 0.00000 | 0.00000 | ; |
| 1  | 5  | 4  | 10 | 3 | 30.33400 | 0.00000 | -30.33400 | 0.00000 | 0.00000 | 0.00000 | ; |
| 1  | 5  | 6  | 7  | 3 | 40.16640 | 0.00000 | -40.16640 | 0.00000 | 0.00000 | 0.00000 | ; |
| 1  | 2  | 3  | 4  | 3 | 39.74800 | 0.00000 | -39.74800 | 0.00000 | 0.00000 | 0.00000 | ; |
| 2  | 1  | 5  | 4  | 3 | 2.51040  | 0.00000 | -2.51040  | 0.00000 | 0.00000 | 0.00000 | ; |
| 2  | 1  | 5  | 6  | 3 | 2.51040  | 0.00000 | -2.51040  | 0.00000 | 0.00000 | 0.00000 | ; |
| 2  | 3  | 4  | 5  | 3 | 40.16640 | 0.00000 | -40.16640 | 0.00000 | 0.00000 | 0.00000 | ; |
| 2  | 3  | 4  | 10 | 3 | 40.16640 | 0.00000 | -40.16640 | 0.00000 | 0.00000 | 0.00000 | ; |
| 5  | 1  | 2  | 3  | 3 | 14.22560 | 0.00000 | -14.22560 | 0.00000 | 0.00000 | 0.00000 | ; |
| 3  | 4  | 5  | 6  | 3 | 30.33400 | 0.00000 | -30.33400 | 0.00000 | 0.00000 | 0.00000 | ; |
| 3  | 4  | 10 | 9  | 3 | 30.33400 | 0.00000 | -30.33400 | 0.00000 | 0.00000 | 0.00000 | ; |
| 3  | 4  | 10 | 11 | 3 | 30.33400 | 0.00000 | -30.33400 | 0.00000 | 0.00000 | 0.00000 | ; |
| 4  | 5  | 6  | 7  | 3 | 40.16640 | 0.00000 | -40.16640 | 0.00000 | 0.00000 | 0.00000 | ; |
| 4  | 10 | 9  | 7  | 3 | 40.16640 | 0.00000 | -40.16640 | 0.00000 | 0.00000 | 0.00000 | ; |
| 5  | 4  | 10 | 9  | 3 | 30.33400 | 0.00000 | -30.33400 | 0.00000 | 0.00000 | 0.00000 | ; |
| 5  | 4  | 10 | 11 | 3 | 30.33400 | 0.00000 | -30.33400 | 0.00000 | 0.00000 | 0.00000 | ; |
| 5  | 6  | 7  | 8  | 3 | 40.16640 | 0.00000 | -40.16640 | 0.00000 | 0.00000 | 0.00000 | ; |
| 5  | 6  | 7  | 9  | 3 | 40.16640 | 0.00000 | -40.16640 | 0.00000 | 0.00000 | 0.00000 | ; |
| 6  | 5  | 4  | 10 | 3 | 30.33400 | 0.00000 | -30.33400 | 0.00000 | 0.00000 | 0.00000 | ; |
| 6  | 7  | 9  | 10 | 3 | 40.16640 | 0.00000 | -40.16640 | 0.00000 | 0.00000 | 0.00000 | ; |
| 7  | 9  | 10 | 11 | 3 | 40.16640 | 0.00000 | -40.16640 | 0.00000 | 0.00000 | 0.00000 | ; |
| 8  | 7  | 9  | 10 | 3 | 40.16640 | 0.00000 | -40.16640 | 0.00000 | 0.00000 | 0.00000 | ; |
| 5  | 10 | 4  | 3  | 3 | 9.20480  | 0.00000 | -9.20480  | 0.00000 | 0.00000 | 0.00000 | ; |
| 4  | 1  | 5  | 6  | 3 | 9.20480  | 0.00000 | -9.20480  | 0.00000 | 0.00000 | 0.00000 | ; |
| 6  | 9  | 7  | 8  | 3 | 9.20480  | 0.00000 | -9.20480  | 0.00000 | 0.00000 | 0.00000 | ; |
| 4  | 9  | 10 | 11 | 3 | 9.20480  | 0.00000 | -9.20480  | 0.00000 | 0.00000 | 0.00000 | ; |

; Include Position restraint file

#ifndef POSRES

#include "posre.itp"

#endif

; Include water topology

#include "amber99sb-ildn.ff/tip3p.itp"

#ifndef POSRES\_WATER

; Position restraint for each water oxygen

[ position\_restraints ]

```
; i funct      fcx      fcy      fcz
  1      1      1000      1000      1000
#endif
```

```
; Include topology for ions
#include "amber99sb-ildn.ff/ions.itp"
```

```
[ system ]
17 system in water
```

```
[ molecules ]
; Compound      nmols
6AP              1
SOL              776
NA               2
CL              2
```

Table S1. The parameters of the simulated systems produced by the Leap module in Amber<sup>a</sup>

| Ligands | RNA                 | Box size (Å)         | Atom number of system | Counter ions(Na <sup>+</sup> ) |
|---------|---------------------|----------------------|-----------------------|--------------------------------|
| HPA     | WT                  | 92.736×70.287×60.137 | 34937                 | 66                             |
|         | A24U                | 89.960×70.742×59.445 | 33536                 | 66                             |
|         | U25A/A46G           | 90.120×71.1985×9.803 | 34137                 | 66                             |
|         | A24U/U25A/A46G      | 90.026×71.734×59.215 | 34080                 | 66                             |
| 6AP     | WT                  | 92.736×70.287×60.137 | 34940                 | 66                             |
|         | U25A/A46G/C74U      | 89.894×71.278×58.972 | 33677                 | 66                             |
|         | A24U/U25A/A46G/C74U | 90.047×72.266×63.302 | 36566                 | 66                             |

<sup>a</sup>All information were automatically produced by the Leap module in Amber by setting the parameters described in our manuscript.

Table S2. Hydrogen bonding interactions of HPA with key residues in the WT and mutated GRs

| <sup>a</sup> Hydrogen bonds        | WT GR                      |              | A24U            |              | U25A/A46G     |              | A24U/U25A/A46G |              |
|------------------------------------|----------------------------|--------------|-----------------|--------------|---------------|--------------|----------------|--------------|
|                                    | <sup>b</sup> Occupancy (%) | Distance (Å) | Occupancy (%)   | Distance (Å) | Occupancy (%) | Distance (Å) | Occupancy (%)  | Distance (Å) |
| <sup>c</sup> HPA@O6...C74@N4...H41 | 73.92                      | 2.98         | <sup>d</sup> -- | --           | 92.85         | 2.94         | 94.46          | 2.95         |
| HPA@N3...U51@N3...H3               | 58.24                      | 3.00         | 84.86           | 3.01         | 45.14         | 3.11         | 97.58          | 29.7         |
| HPA@O6...U22@O2'-HO2'              | --                         | --           | 33.32           | 2.81         | --            | --           | --             | --           |
| U22@O2'...HPA@N7-H3                | 80.17                      | 2.93         | 95.44           | 2.89         | 91.22         | 2.91         | 91.24          | 2.96         |
| C74@N3...HPA@N1-H1                 | 78.84                      | 2.89         | --              | --           | 93.17         | 2.91         | 95.17          | 2.95         |
| C74@O2...HPA@N1-H1                 | --                         | --           | 98.58           | 2.96         | --            | --           | --             | --           |

<sup>a</sup>Hydrogen bonds are determined by the acceptor...donor distance of < 3.5 Å and acceptor...H-donor angle of > 120°.

<sup>b</sup>Occupancy(%) is defined as the percentage of simulation time that a specific hydrogen bond exists.

<sup>c</sup>The full lines indicate chemical bonds, and the dotted lines describe hydrogen bonding interactions.

<sup>d</sup>The symbol "--" indicates that occupancy of hydrogen bonds formed between HPA and nucleotides is lower than 20%.



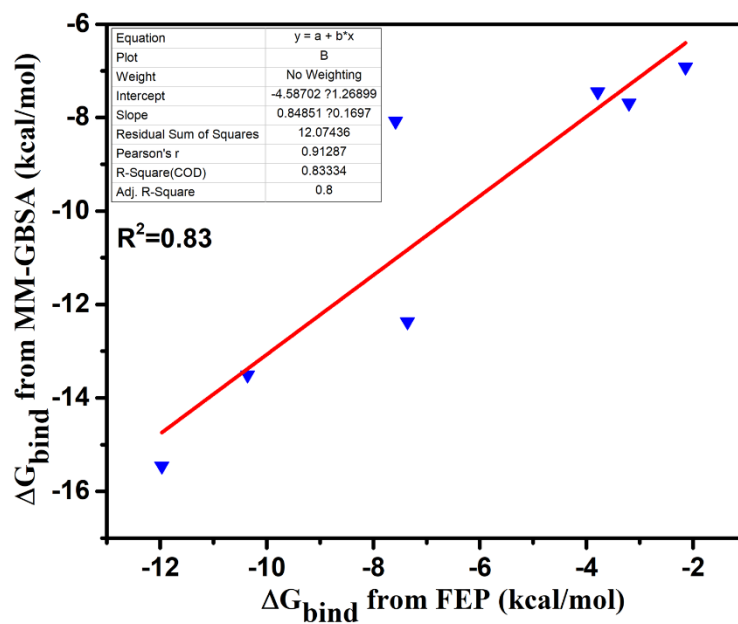

Figure S1. Correlation relationship between binding free energies calculated by FEP method and that by MM-GBSA method.

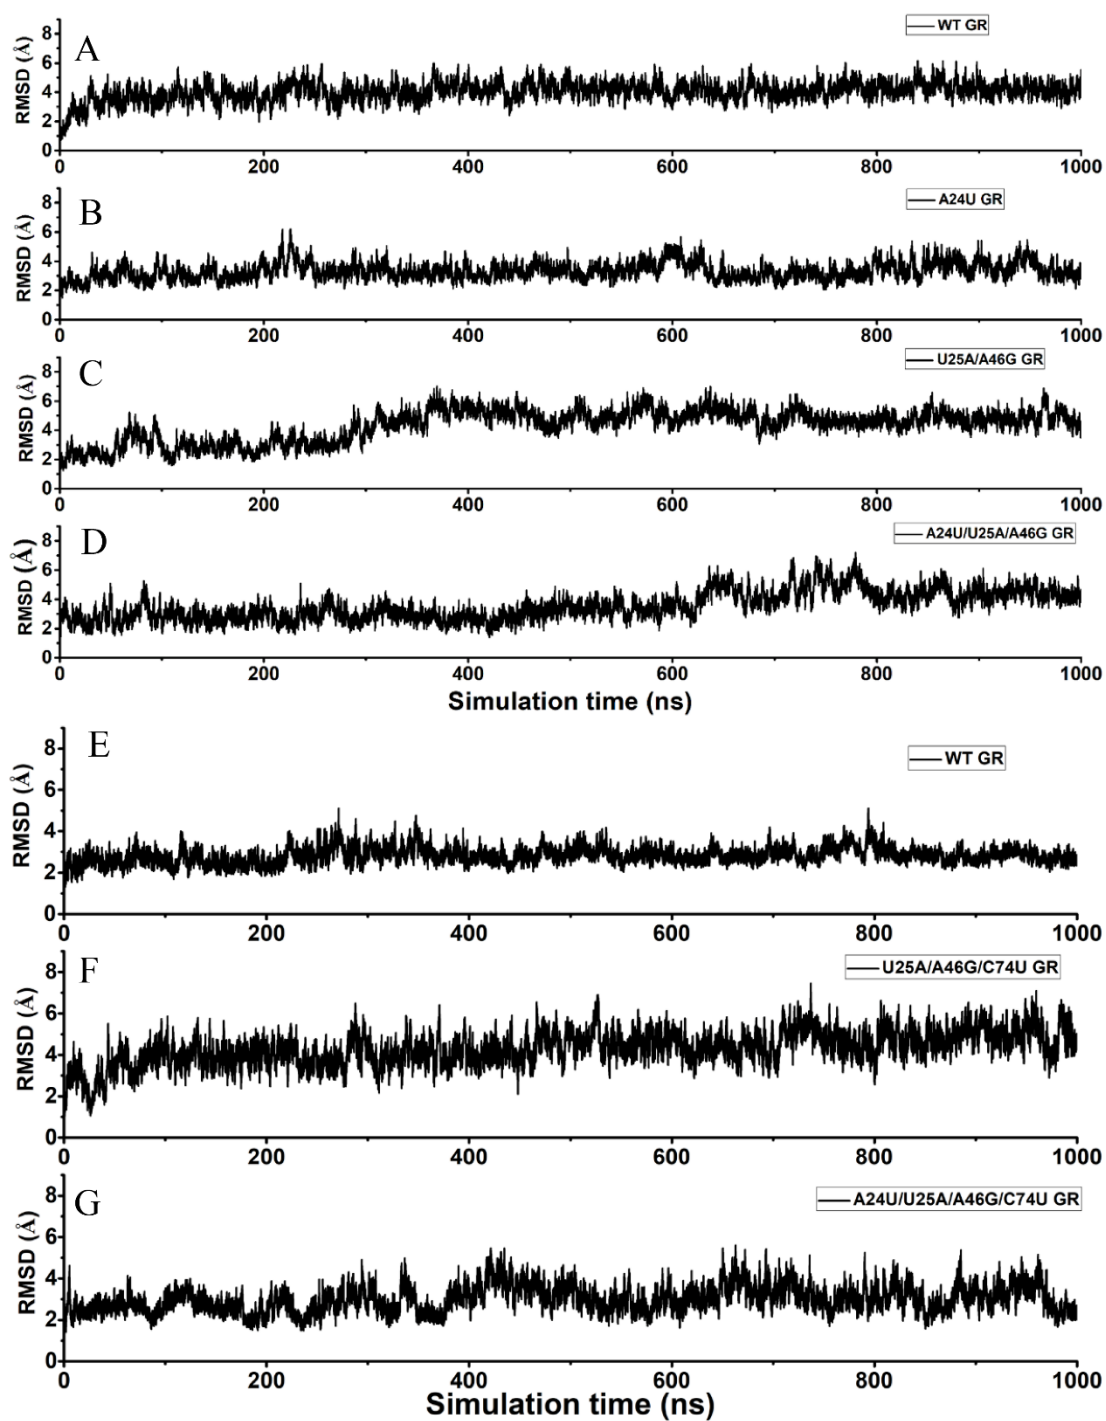

Figure S2. Root-mean-square deviations (RMSDs) of atoms P1, O3', O5', C3', C4' and C5' in GR: (A)-(D) the WT and mutated GRs with ligand HPA, (E)-(G) the WT and mutated GRs with ligand 6AP.

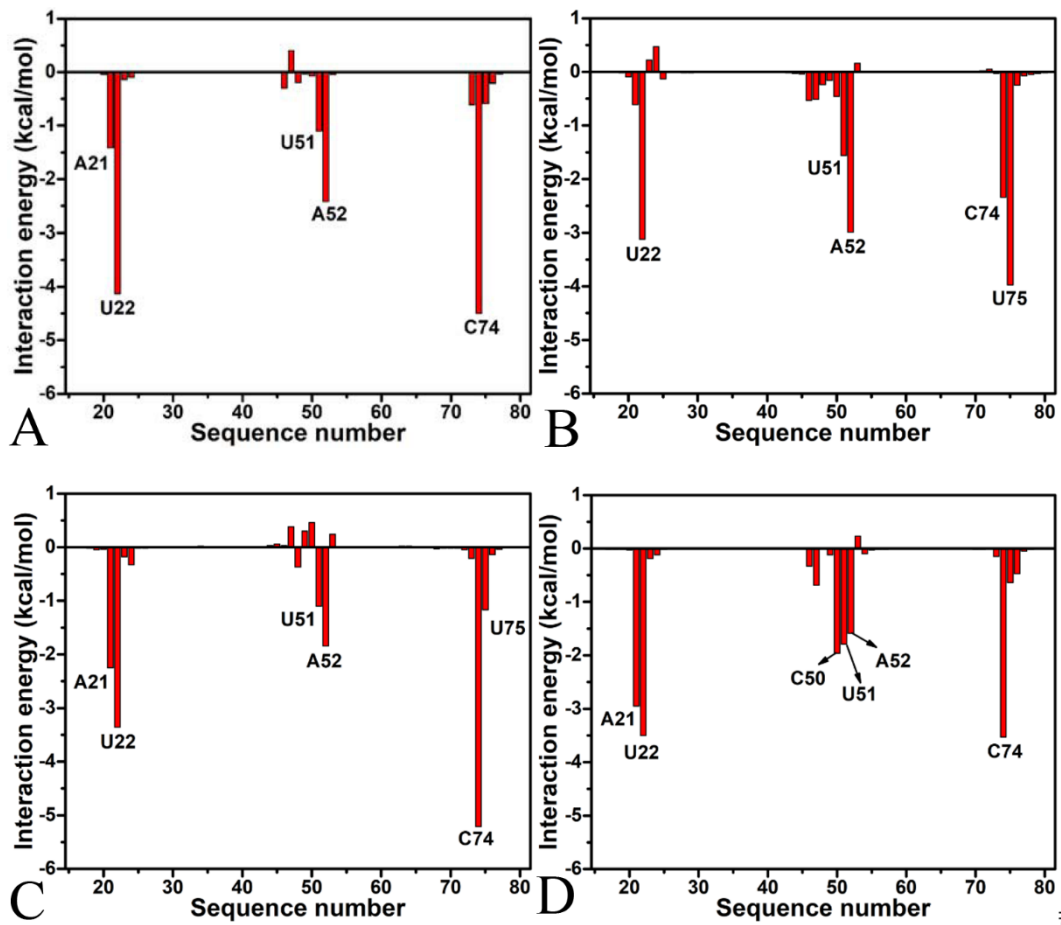

Figure S3. HPA-nucleotide interaction spectrum: (A) the WT GR, (B) the GR with mutation A24U, (C) the GR with mutations U25A/A46G and (D) the GR with mutations A24U/U25A/A46G. Only nucleotides of interaction energies stronger than 1.0 kcal/mol were labeled.

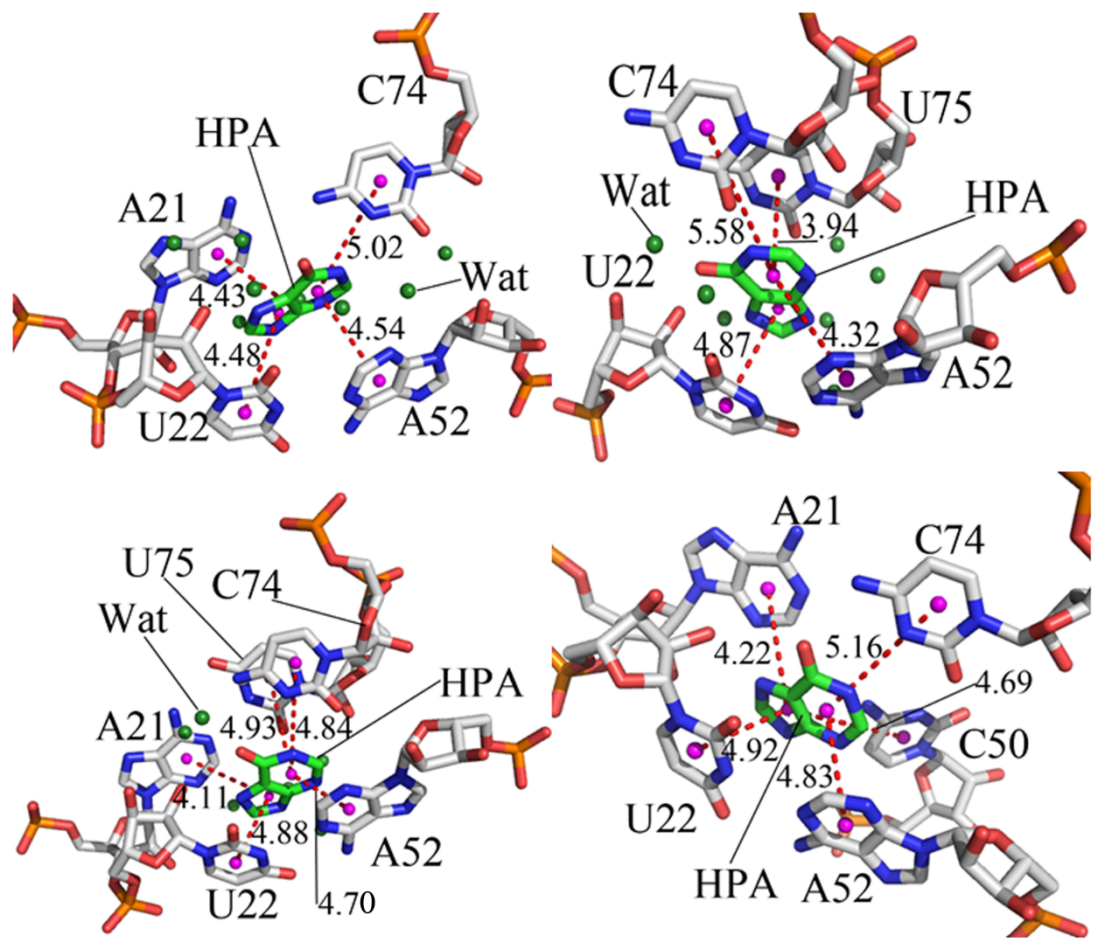

Figure S4. Hydrophobic interactions of HPA with key nucleotides in the WT and mutated GRs: (A) WT, (B) A24U, (C) U25A/A46G and (D) A24U/U25A/A46G. The key nucleotides and HPA are shown in stick modes and water molecules in the forest color balls. The magenta balls represent pseudoatoms forming hydrophobic interactions between 6AP and nucleotides.

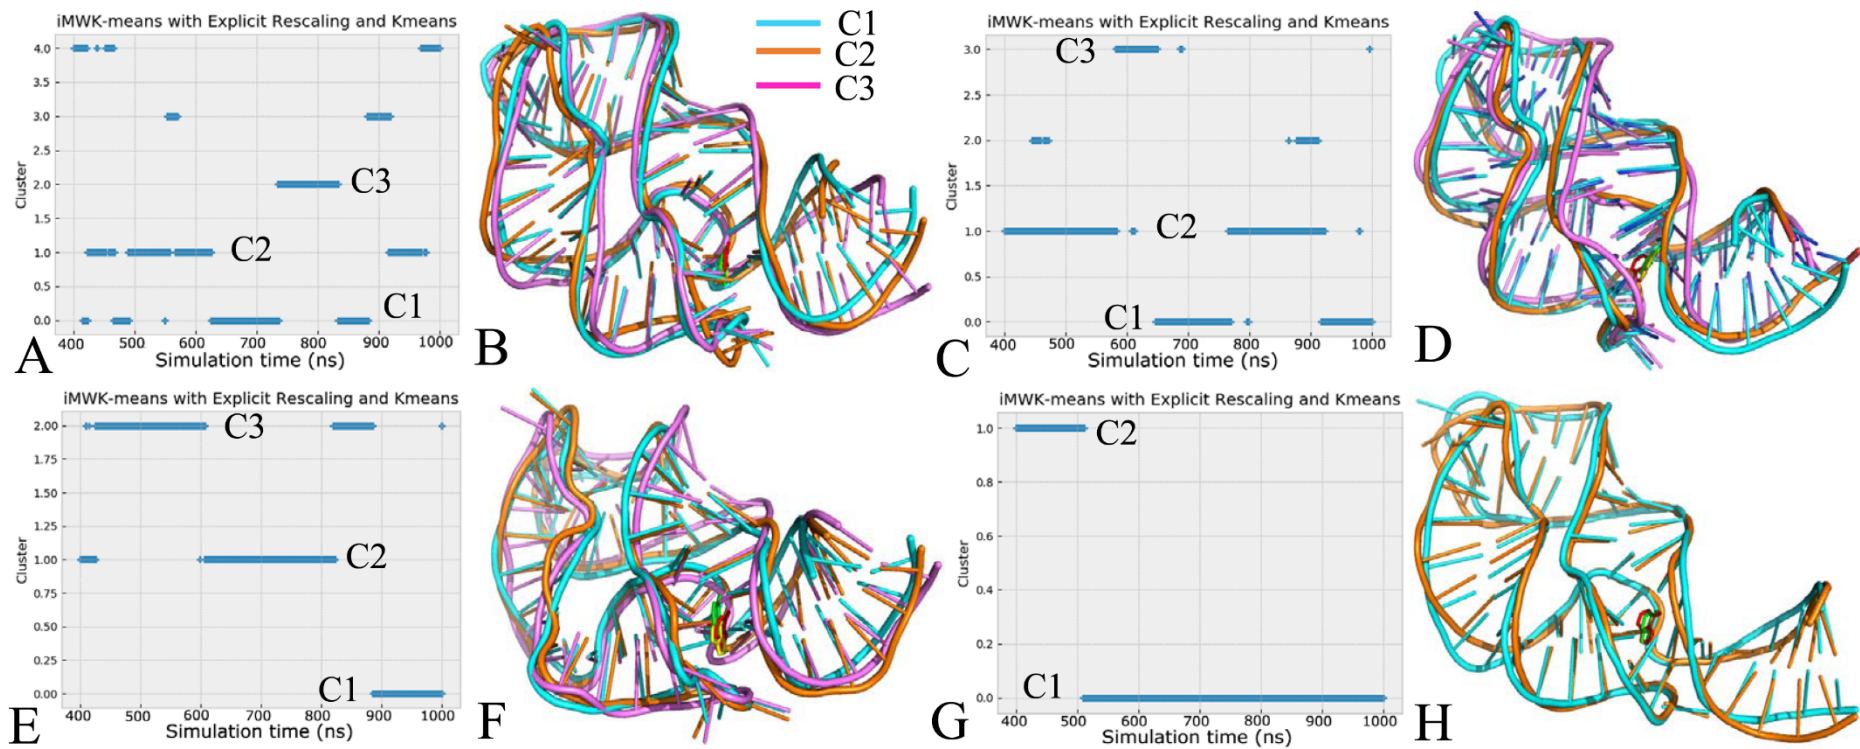

Figure S5. Cluster analyses and superimpositions of corresponding structures: (A), (C), (E) and (G) depict the cluster analyses performed by using iMWK-Means method, and (A), (C), (E) and (G) respectively represent the WT, A24U, U25A/A46G and A24U/U25A/A46G GRs complexed with HPA; (B), (D), (F) and (H) display superimpositions of structures extracted from different clusters C1, C2 and C3. GRs are shown in cartoon modes and HPA is displayed in stick modes with green, red and yellow.

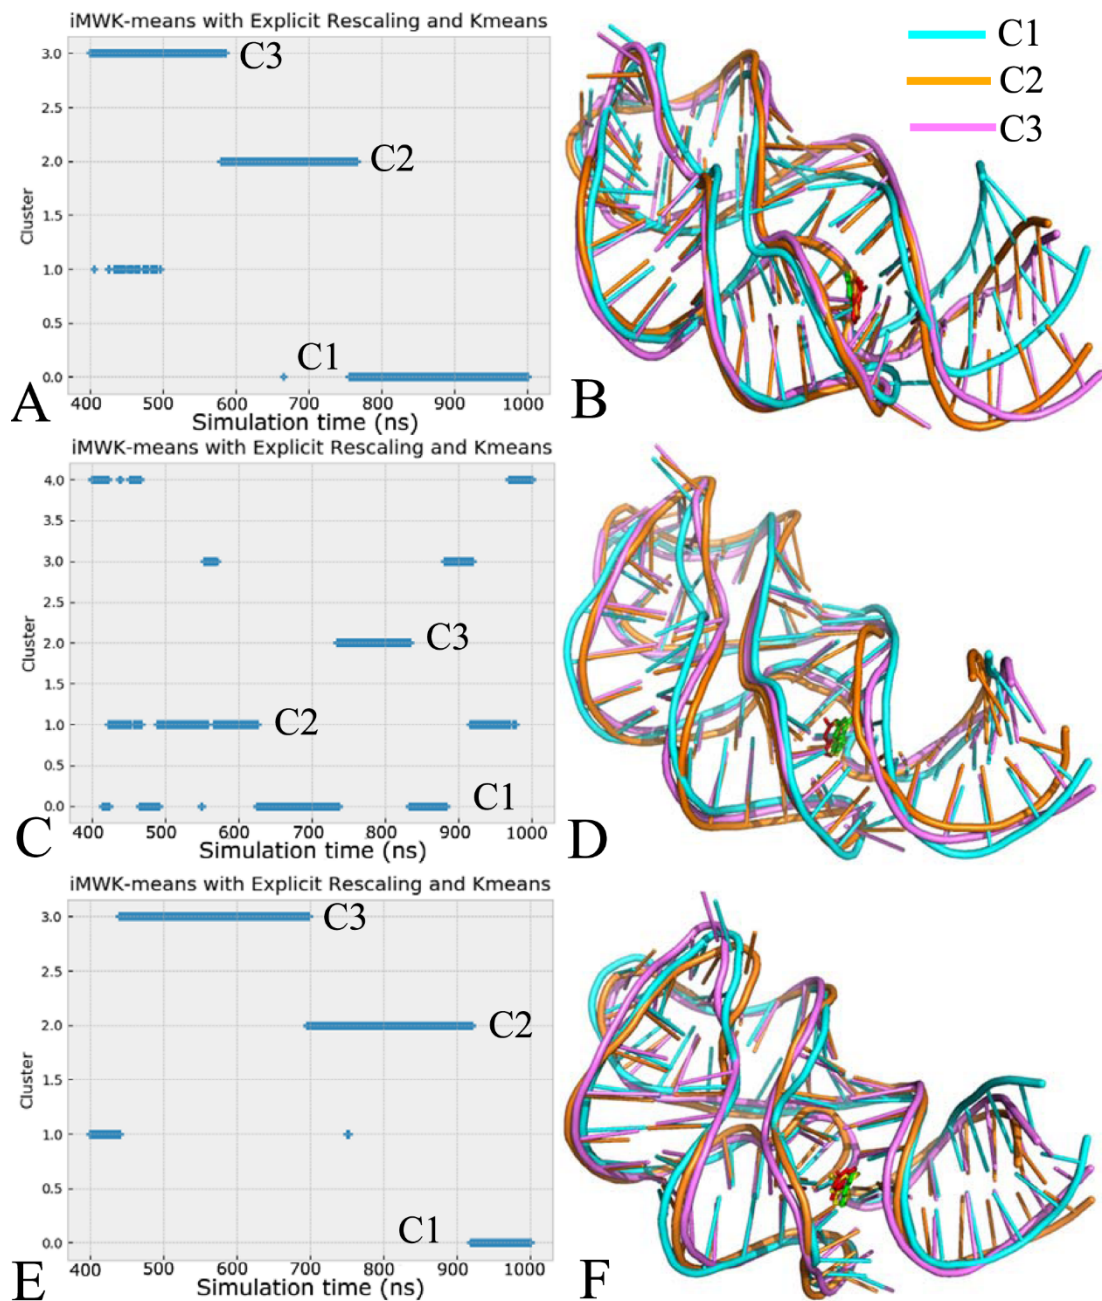

Figure S6. Cluster analyses and superimpositions of corresponding structures: (A), (C) and (E) depict the cluster analyses performed by using iMWK-Means method, and (A), (C) and (E) respectively indicate the WT, U25A/A46G/C74U and A24U/U25A/A46G/C74U GRs complexed with 6AP; (B), (D) and (F) show superimpositions of structures extracted from different clusters C1, C2 and C3. GRs are depicted in cartoon modes and 6AP is shown in stick modes with green, red and yellow.

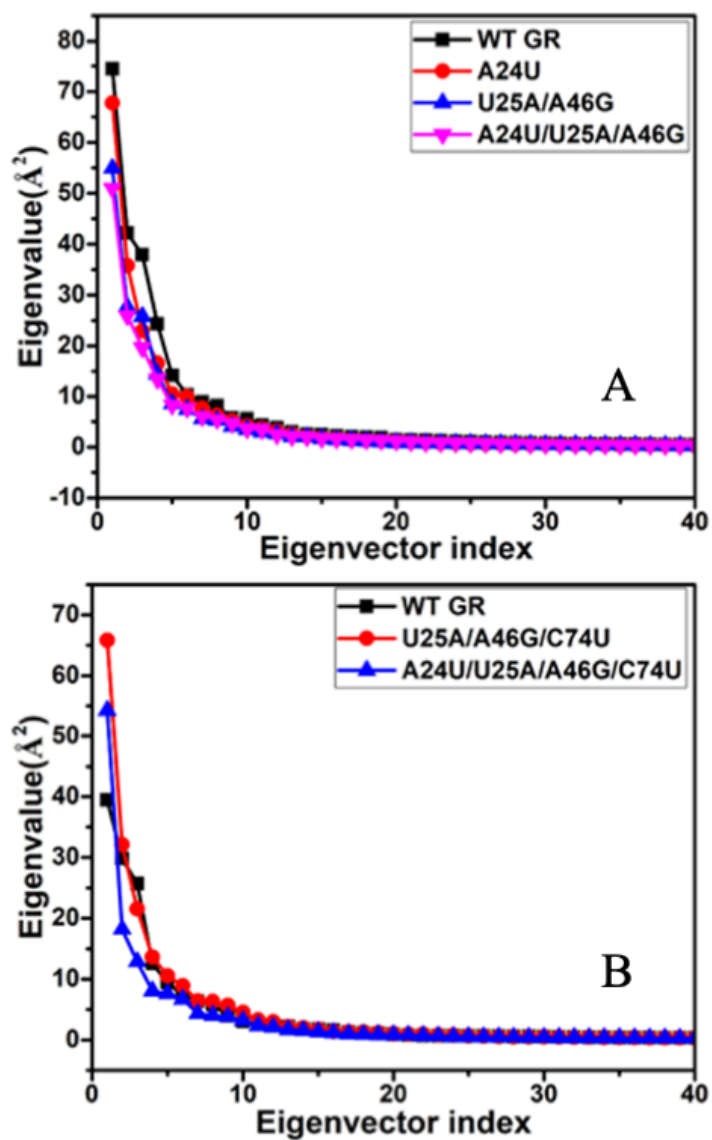

Figure S7. Comparison of the eigenvalues plotted against the corresponding eigenvector indices obtained from the covariance matrix of C1' atoms in GR constructed from the equilibrated MD trajectories: (A) the WT and mutated GRs complexed with HPA and (B) the WT and mutated GRs complexed with 6AP.

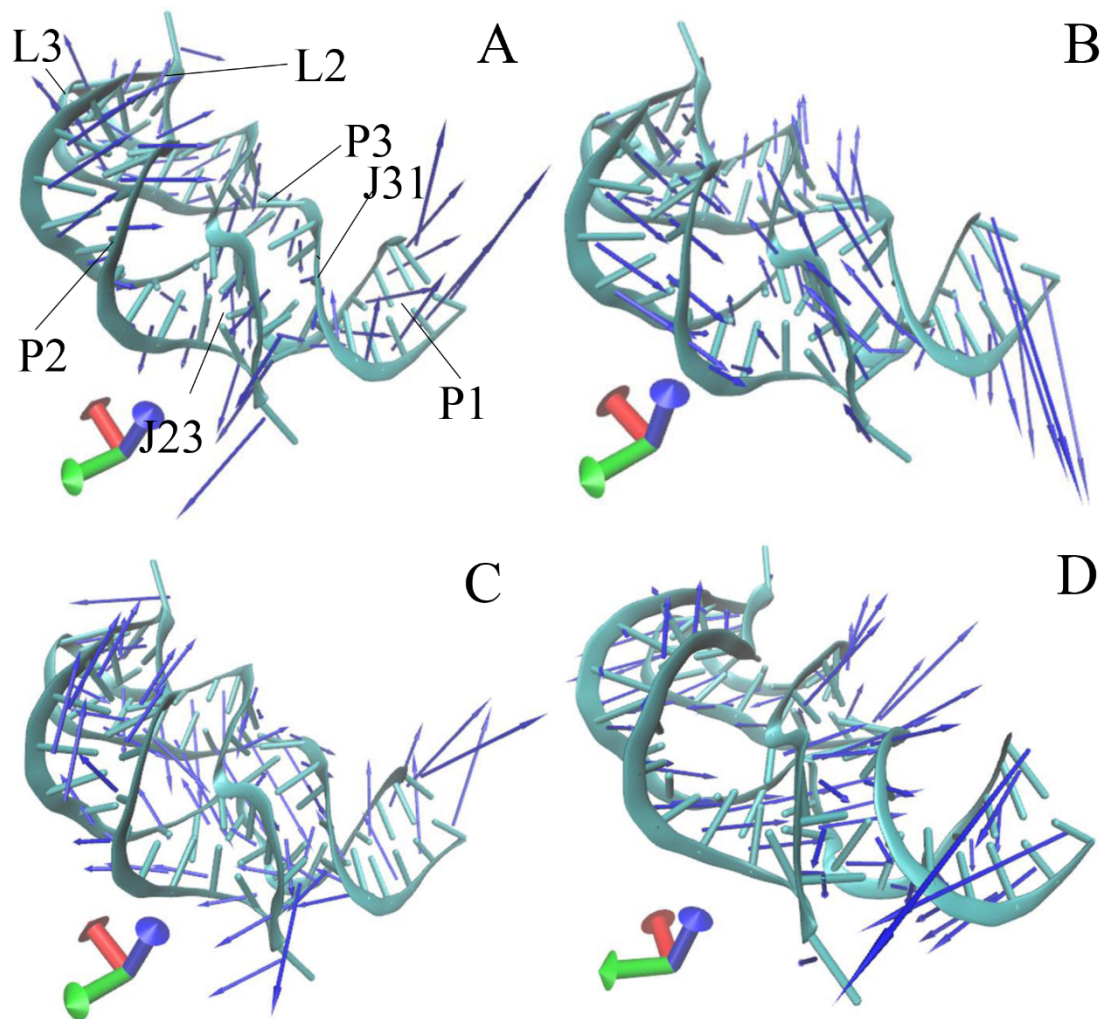

Figure S8. Collective motions reflected by the first eigenvector corresponding to the principal component PC1 obtained by performing principal component analysis (PCA) on the equilibrated MD trajectories of the WT and mutated GRs complexed with HPA: (A) WT, (B) A24U, (C) U25A/A46G and (D) A24U/U25A/A46G. In this figure, the direction and length of the arrows respectively reflect the motion direction and strength of nucleotides in GR.



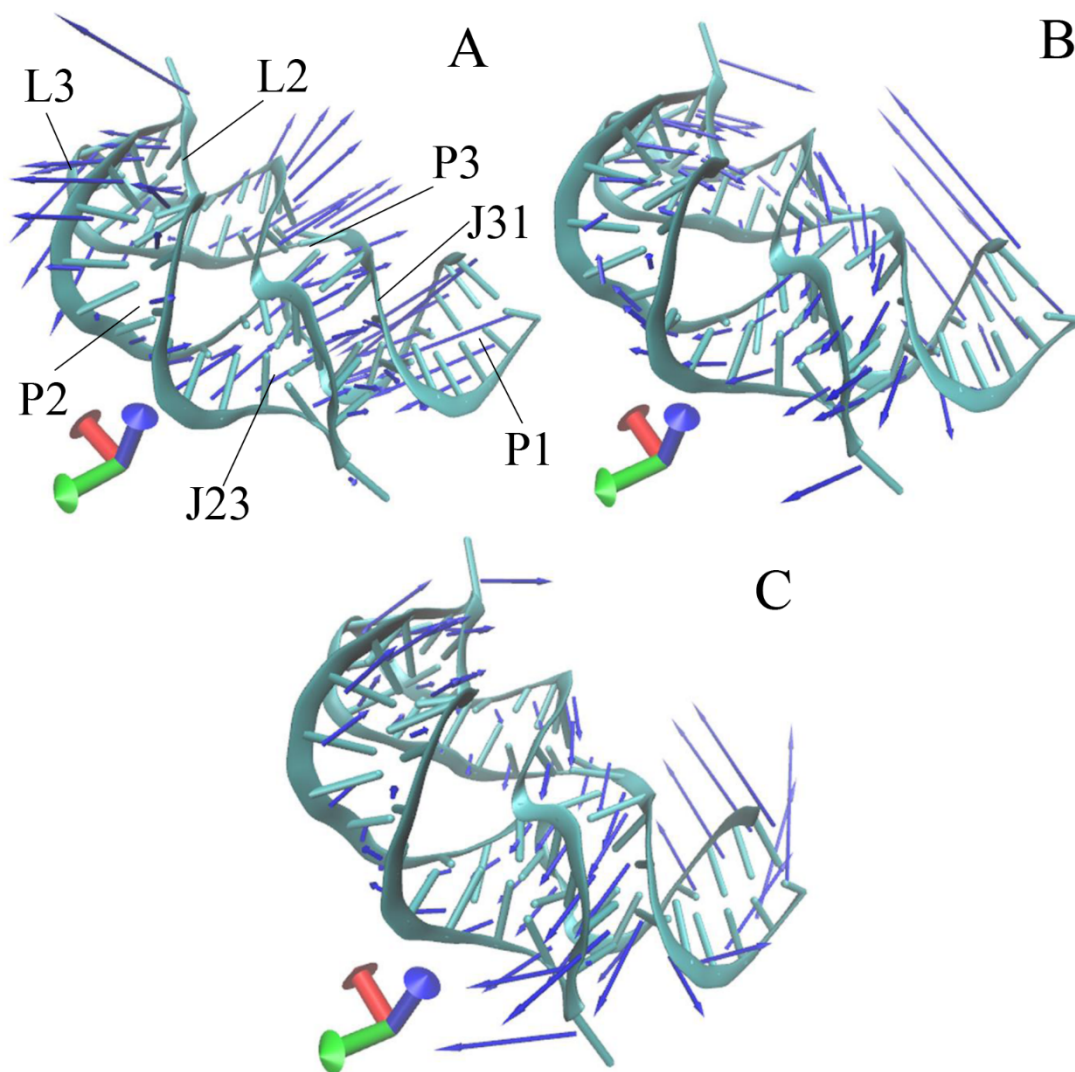

Figure S9. Collective motions reflected by the first eigenvector corresponding to the principal component PC1 obtained by performing principal component analysis (PCA) on the equilibrated MD trajectories of the WT and mutated GRs complexed with 6AP: (A) WT, (B) U25A/A46G/C74U and (C) A24U/U25A/A46G/C74U. In this figure, the direction and length of the arrows respectively reflect the motion direction and strength of nucleotides in GR.

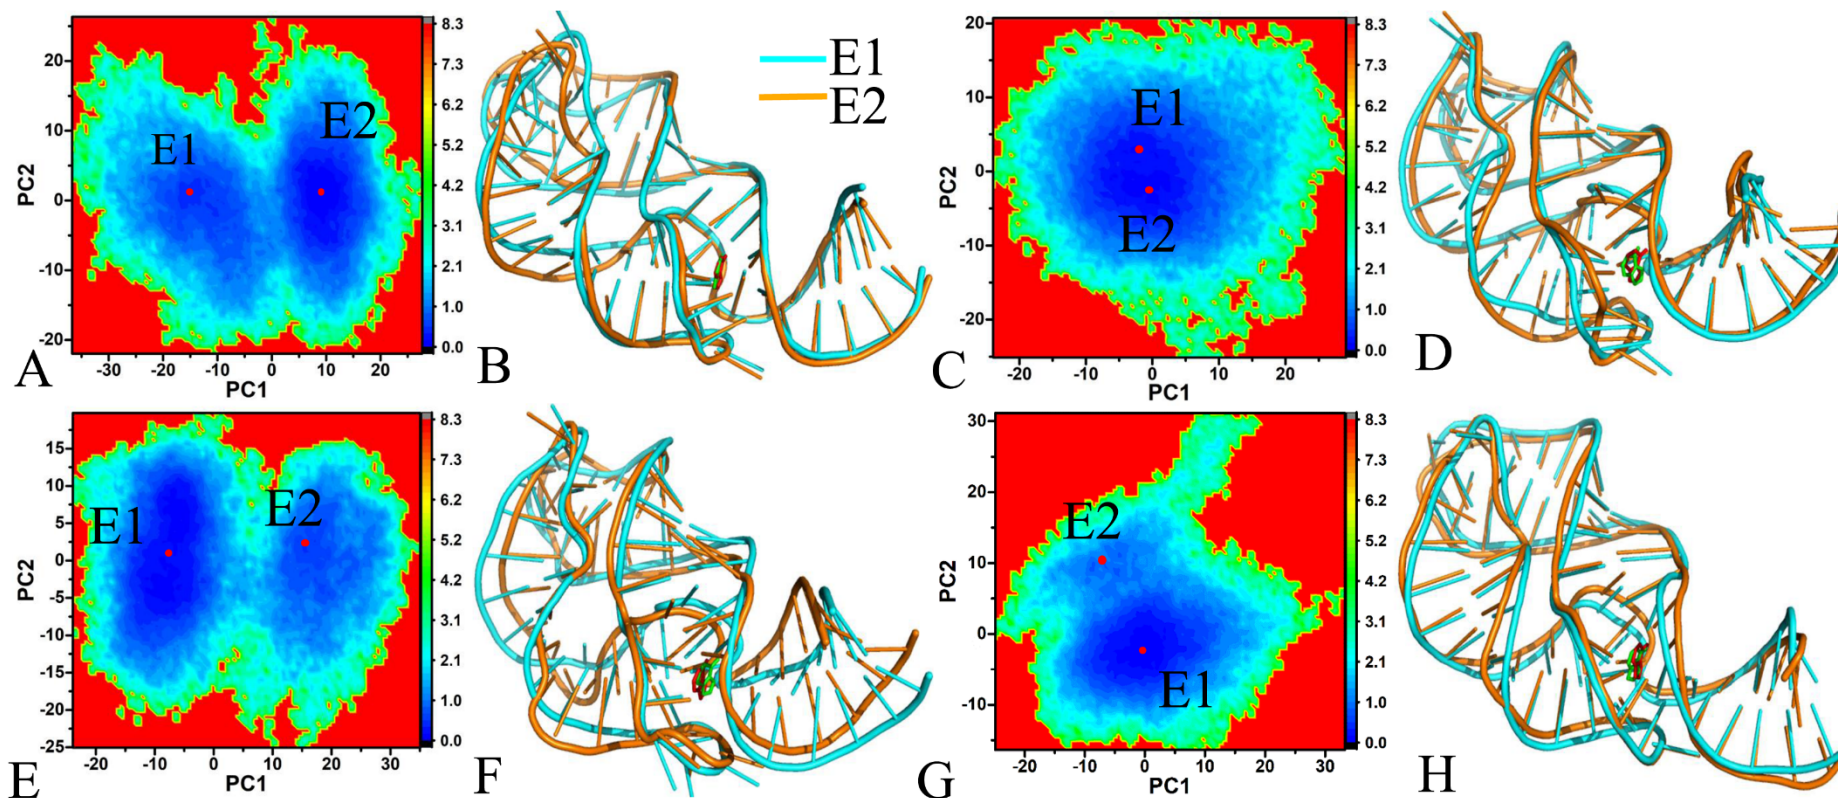

Figure S10. Free energy landscapes and structural superimposition of the WT and mutated GRs with HPA: (A), (C), (E) and (G) depict free energy landscapes constructed using projection of MD trajectories on the first two principal components PC1 and PC2 from the diagonalization of covariance matrix, among which (A), (C), (E) and (G) separately correspond to the WT, A24U, U25A/A46G and A24U/U25A/A46G GRs; (B), (D), (F) and (H) display superimpositions of structures represented by free energy basins E1 and E2, and (B), (D), (F) and (H) respectively indicate the WT, A24U, U25A/A46G and A24U/U25A/A46G GRs. GRs are shown in cartoon modes and HPA is displayed in stick modes with green, red and yellow.

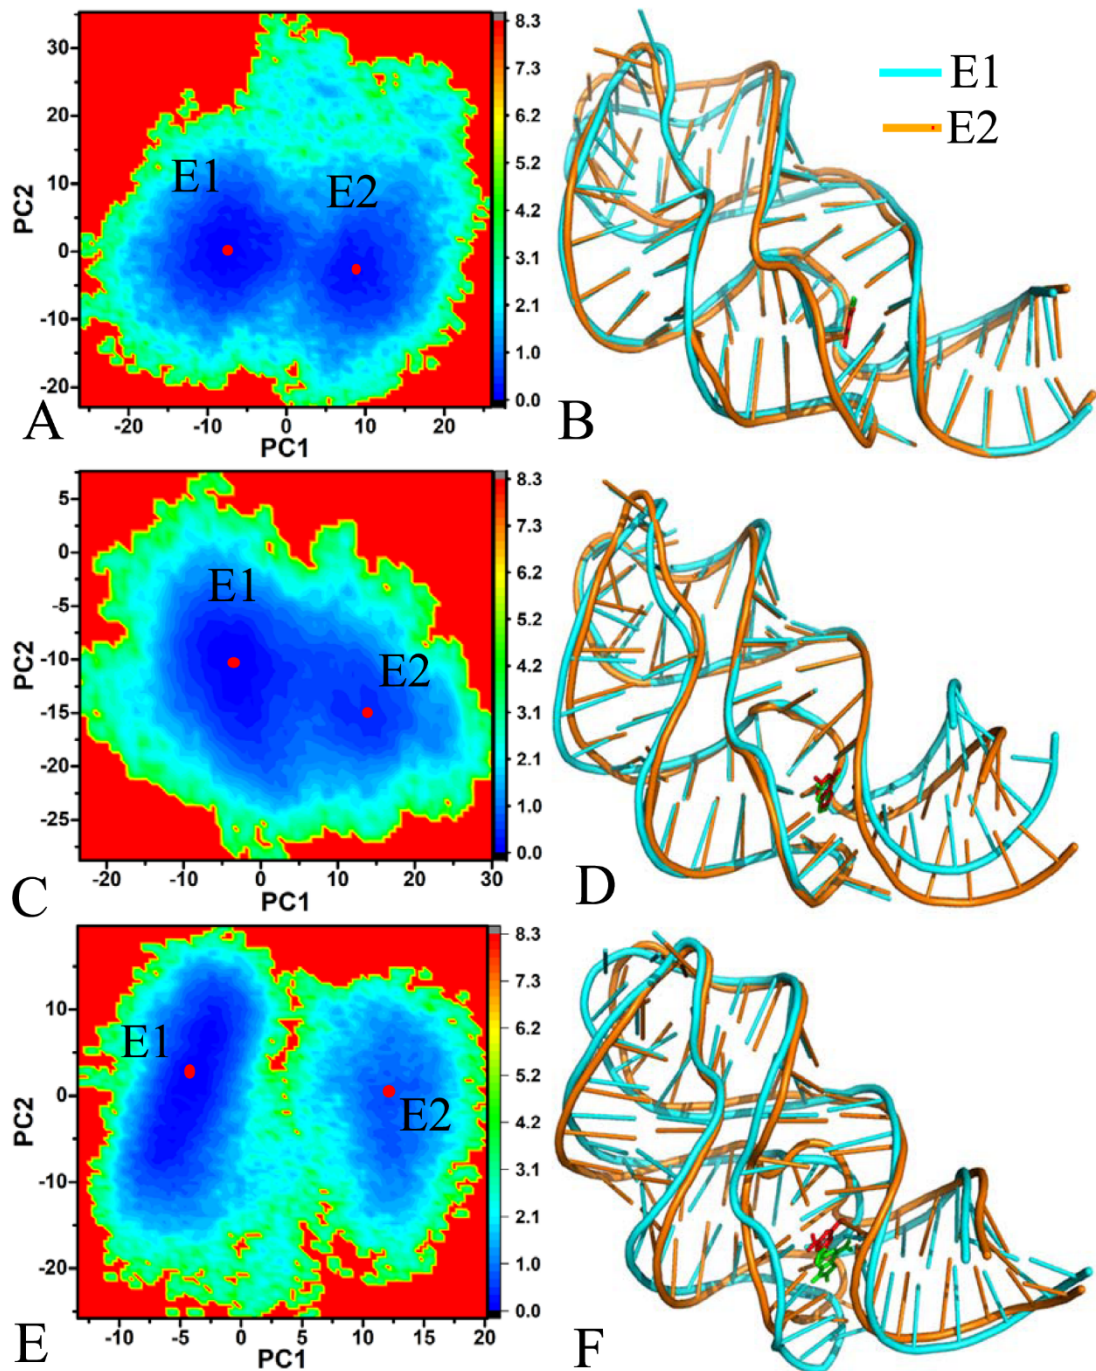

Figure S11. Free energy landscapes and structural superimposition of the WT and mutated GRs with 6AP: (A), (C) and (E) depict free energy landscapes constructed using projection of MD trajectories on the first two principal components PC1 and PC2 from the diagonalization of covariance matrix, among which (A), (C) and (E) separately correspond to the WT, U25A/A46G/C74U and A24U/U25A/A46G/C74U GRs; (B), (D) and (F) display superimpositions of structures represented by free energy basins E1 and E2, and (B), (D) and (F) respectively indicate the WT, U25A/A46G/C74U and A24U/U25A/A46G/C74U GRs. GRs are shown in cartoon modes and 6AP is displayed in stick modes with green, red and yellow
